## 29 **Abstract**

30 Prior exposure to a single serotype of dengue virus (DENV) predisposes individuals to severe  
31 disease upon secondary heterologous DENV infection. Here we show that the length of time  
32 between DENV/Zika (ZIKV) infections has a qualitative impact on controlling ZIKV replication.  
33 We identified limited but significant differences in the magnitude of the early humoral immune  
34 response associated with a period of twelve months but not three months of DENV  
35 convalescence. However, their role limiting ZIKV replication is not conclusive. There was no  
36 evidence of in vivo antibody-dependent amplification of ZIKV by DENV immunity in any group.  
37 We are also showing that the significant differences among groups may be linked to a pre-  
38 existing polyfunctional CD4+ T cells response (increased IFN-g and Cd107a before ZIKV  
39 infection) and to an early and continuous expansion of the CD4+ effector memory cells early on  
40 after ZIKV infection. Those significant differences were associated with a period of 12 months  
41 after DENV infection that were not observed in a span of 3-months. These results suggest that  
42 there is a window of optimal cross-protection between ZIKV and DENV with significant  
43 consequences. These results have pivotal implications while interpreting ZIKV pathogenesis in  
44 flavivirus-experimented populations, diagnostic results interpretation and vaccine designs  
45 among others.

46

## 47 **Author Summary**

48 Since its introduction in the Americas region ZIKV virus has been associated to severe birth  
49 defects. One of the questions that remains open is the role of previous dengue or any other  
50 flavivirus immunity in the pathogenesis of ZIKV and more important, if the time elapse between  
51 DENV and ZIKV play a role enhancing ZIKV pathogenesis as it is the case for subsequent  
52 DENV infections. On this work, using NHP as a model we compared the effect of a period of 12  
53 months vs. a period of 3 months of DENV immunity in the outcome of ZIKV infection. We found  
54 that previous DENV infection, at any of the tested period of time do not induce ZIKV  
55 enhancement. More relevant are showing that when the two infection occurs at least one year  
56 apart the preexisting DENV immunity is better at controlling ZIKV replication and that the role of  
57 the neutralizing antibodies is very limited. On the contrary our results suggest that early after  
58 ZIKV infection the cellular immune response, may plays a predominant role. Our findings have  
59 critical relevance to understand the dynamic interaction between these two flavivirus, their  
60 pathogenies, diagnosis and vaccine design.

61

62

63

64

65

66

67

68 Zika virus (ZIKV) spread in the Americas has been linked to unique severe adverse outcomes  
69 such as fetal loss (1), congenital Zika syndrome (CZS) (2), Guillain-Barré syndrome (GBS) (3),  
70 and rare cases of encephalopathy (4), meningoencephalitis (5), myelitis (6), uveitis (7), and  
71 severe thrombocytopenia (8). Previous studies have shown that prior exposure to a single  
72 serotype of dengue virus (DENV) predisposes individuals to severe disease upon secondary  
73 heterologous DENV infection. However, the association of previous flavivirus exposure at any  
74 time before ZIKV infection with the severe adverse outcomes of the infection is still unclear.

75 ZIKV infection remains a public health concern with the recent epidemic infecting millions of  
76 people in the Americas<sup>8</sup>. ZIKV also poses a pandemic threat, with studies demonstrating that a  
77 larger range of the tropical and subtropical regions have suitable conditions for ZIKV  
78 transmission and dissemination<sup>1</sup>. ZIKV is mainly transmitted through the bite of *Aedes aegypti*,  
79 the same vector implicated in DENV infection, there are however other routes of infection  
80 including sexual contact (9-11) and vertical transmission (12-14) that increase the spread of the  
81 virus.

82 Diseases associated with arboviruses are cyclical. While viruses like DENV and yellow fever  
83 (YFV) remain endemic in multiple areas of the world, outbreaks of increased disease severity  
84 associated with these viruses occur intermittently over the course of multiple years. The timing  
85 of these outbreaks is particularly relevant for DENV as the time between a primary and a  
86 secondary DENV infection is relevant to the clinical presentation. A short interval between  
87 homologous or heterologous DENV infection usually results in protection from disease, while an  
88 extended period of time is associated with the potential for severe dengue (15-17), due to either  
89 cross-reactive antibodies (18, 19) and/or T cells (20-22).

90 Little is known about the contribution of virus-specific and cross-reacting antibodies or the  
91 cellular immune response generated by a primary DENV infection on the viremia and  
92 pathogenesis of a secondary ZIKV infection *in vivo* (23). To address the role of prior flavivirus  
93 exposure on ZIKV-associated to disease severity we recently showed that a previous DENV  
94 infection (>2 years) does not result in an increase in ZIKV viremia or pathogenesis (24).  
95 Interestingly, DENV-immune animals showed a non-statistically significant shorter viremic  
96 period compared to DENV-naive macaques.

97 In this work, we examine the contribution of time between primary and heterologous flavivirus  
98 exposure to determine if that factor contributes to cross-protection between ZIKV and DENV.  
99 We found that the length of time between the DENV and ZIKV infections has a qualitative

100 impact on controlling the ZIKV infection. In this study, as in our prior work we did not observe  
101 evidence of ZIKV disease enhancement associated with prior DENV exposure. We also  
102 confirmed that the significant differences among groups are mediated by the pre-existence of a  
103 robust effector memory T cell (TEM) and cytotoxic activity mainly mediated by CD4<sup>+</sup> T cells  
104 more than qualitative differences in the humoral immune response. However, by conducting a  
105 detailed study of the ZIKV-neutralizing titers vs. ZIKV RNAemia at early time points after  
106 infection, we were able to determine a possible contribution of the neutralizing antibodies  
107 limiting the ZIKV replication at 7 days after infection in the animals with 12 months but not 3  
108 months of DENV immunity or in the control group. Overall, we demonstrated that exposure to  
109 ZIKV 12 months after DENV infection afford a high level of T cell-mediated cross protection than  
110 it was observed at the 3-month span. Based on our previous study we believe this protection  
111 wanes as macaques exposed to ZIKV 2.8 years after DENV were not afforded this protection.  
112 These results suggest that there is a window of optimal T cell cross-protection between ZIKV  
113 and DENV.

114

## 115 Results

116 **Rhesus macaque cohorts and sample collection.** Six rhesus macaques (*Macaca mulatta*)  
117 were infected with  $5 \times 10^5$  pfu s.c. of DENV-2 New Guinea 44 in 2016 (cohort 1 in Fig. 1). In  
118 2017, four rhesus macaques were infected with the same virus strain and pfu (cohort 2 in Fig.  
119 1). In addition, a control group, composed by six flavivirus-naïve rhesus macaques were added  
120 as control (cohort 3 in Fig. 1). All three cohorts were infected with  $1 \times 10^6$  pfu s.c. ZIKV  
121 PRVABC59 on the same day, defining exposure time between infections for cohorts 1 and 2 as  
122 12 months or middle convalescent and 3 months or early convalescent, respectively (Fig. 1).  
123 Prior to the challenge with ZIKV, all sixteen animals were put through a quarantine period of  
124 forty days. Figure 1 also denotes the unexpected setback that Hurricane María brought to our  
125 work plan. Sample collection programmed from days 7 to 29 p.i. was interrupted due to inability  
126 of access and/or lack of power at the CPRC facilities, University of Puerto Rico, San Juan,  
127 Puerto Rico.

128

129 **Clinical status and laboratory results are affected by DENV immunity.** To determine how a  
130 previous DENV infection affects the clinical status of non-human primates after a ZIKV infection,  
131 day 0 (baseline), day 6 p.i. and day 30 p.i. were compared in terms of complete blood count and  
132 liver enzymes levels. All sixteen animals belonging to this study were continuously monitored  
133 and evaluated twice daily for evidence of disease or injury. All animals were inside the range in  
134 terms of weight (Fig. S1). DENV 3M animals presented a significant increase in external  
135 (axillary) temperature compared to DENV 12M and naïve animals at day 5 p.i., followed by a  
136 sudden drop by day 6 p.i. ( $P < 0.0005$ ; mean diff.: -2.05, CI95%: -3.31 to -0.80 and  $P < 0.0001$ ;  
137 mean diff.: 2.75, CI95%: 1.49 to 4.00, respectively) (Fig 2A). No variations were detected in  
138 rectal temperature (Fig. 2B). Liver enzyme aspartate aminotransferase (AST) and alanine  
139 aminotransferase (ALT) levels were significantly elevated at day 6 p.i. in the naïve and DENV  
140 12M animals compared to their baseline levels ( $P < 0.001$ ; mean diff.: -23.8, CI95%: -38.15 to -  
141 9.51 and  $P < 0.0001$ ; mean diff.: -33, CI95%: -47.32 to -18.60, respectively), while DENV 3M  
142 animals did not present major variations between baseline and day 6 p.i. (Fig. 2C,D). The naïve  
143 group had significantly higher values of AST compared to both DENV immune animals (Fig.  
144 2C), and of ALT compared to the DENV 3M group (Fig. 2D) ( $P < 0.05$ ; mean diff.: 18.3, CI95%:  
145 4.01-32.7 and  $P < 0.001$  for naïve vs. DENV 12M; mean diff.: 33.2, CI95%: 17.2 to 49.3 for naïve  
146 vs. DENV 3M). Values returned to near baseline levels in all three group by day 30 after the  
147 infection. These results together suggest that previous immunity to DENV may play a protective

148 role against ZIKV-induced liver damage. All cohorts had a drop in white blood cell counts (WBC)  
149 by day 6 p.i. that increased to near baseline levels by day 30 p.i. (Fig. S2A). No significant  
150 variations were noticed in platelet counts (PLT) for any of the cohorts (Fig. S2B). Although no  
151 differences were detected between groups, monocytes (MON) were significantly higher in the  
152 naïve animals by day 6 p.i. compared to their baseline levels ( $P<0.05$ ; mean diff.: 0.25, CI95%:  
153 0.00 to 0.46) (Fig. S2C,D). This was not observed in the DENV pre-exposed animals.

154

155 **ZIKV RNAemia is affected by the longevity of previous DENV immunity.** To determine if  
156 previous immunity to DENV enhances or reduces ZIKV replication, and how it changes  
157 depending on the convalescent period, ZIKV RNAemia was measured in serum and urine using  
158 qRT-PCR. RNAemia was defined as follows: early from day 1 to 3 p.i., middle from day 4 to 7  
159 p.i., and late viremia from day 7 p.i. onwards (days 30 and 60). During the early period, viral  
160 RNA detection increased similarly in all groups (Fig. 3A).

161 Of note, DENV-middle convalescent animals had significantly lower peak viremia on day 4  
162 compared with the rest of the animals ( $P<0.042$  vs. naïve and  $P<0.019$  vs. DENV3M group). By  
163 day 5 all three groups had two animals with undetectable viremia. However, the set-point  
164 viremia in the four animals from DENV-12M group was significantly lower compared to the four  
165 animals having viremia in the naïve group ( $P<0.039$ ) (Fig. 3A and Table 1). By days 6 and 7 p.i.,  
166 there was no viral RNA detection in the DENV-middle convalescent group, while DENV 3M  
167 animals showed a trend towards an intermittent viremia and most of the naïve animals still had  
168 detectable viral RNA. By days 30 and 60 all animals tested negative for ZIKV (Fig. 3A and Table  
169 1).

170 We defined total mid-RNAemia days as the days with detectable viremia out of all possible days  
171 with detectable viremia during the collection period. The animals exposed to DENV 12 months  
172 earlier had the least viremia days in comparison with the naïve group, and the difference was  
173 statistically significant ( $P<0.05$ ) (Fig. 3B). These results suggest that a previous infection with  
174 DENV contributes to an earlier and more efficient control of ZIKV viremia in a subsequent  
175 infection, but only if at least 12 months (a middle convalescence period) have passed between  
176 infections. Lastly, ZIKV vRNA in urine was measured using qRTPCR, but only one animal from  
177 the DENV 3M group (MA023) had detectable levels at day 6 p.i. (results not shown).

178

| ID    | Immune History         | RNAemia (Log10 genome copies/mL) (ZIKV PRNT60 ) Post-ZIKV Infection* |       |             |       |             |             |            |            |            |       | Days |  |
|-------|------------------------|----------------------------------------------------------------------|-------|-------------|-------|-------------|-------------|------------|------------|------------|-------|------|--|
|       |                        | 1                                                                    | 2     | 3           | 4     | 5           | 6           | 7          | 30         | 60         | Total | Mean |  |
| BS97  | 1° DENV-2<br>12 months | 5.742 (<20)                                                          | 6.298 | 6.071 (<20) | 3.626 | 1.956 (40)  | 0.0 (40)    | 0.0 (80)   | 0.0 (5120) | 0.0 (2560) | 28    | 4.67 |  |
| OP1   |                        | 4.904 (<20)                                                          | 5.725 | 5.448 (<20) | 3.947 | 2.715 (20)  | 0.0 (20)    | 0.0 (80)   | 0.0 (640)  | 0.0 (640)  |       |      |  |
| 508   |                        | 4.522 (<20)                                                          | 5.631 | 5.584 (<20) | 3.978 | 0.0 (20)    | 0.0 (160)   | 0.0 (320)  | 0.0 (640)  | 0.0 (320)  |       |      |  |
| 101   |                        | 5.303 (<20)                                                          | 6.079 | 5.584 (<20) | 4.542 | 2.264 (40)  | 0.0 (20)    | 0.0 (80)   | 0.0 (640)  | 0.0 (640)  |       |      |  |
| 4P0   |                        | 5.303 (<20)                                                          | 5.631 | 5.419 (<20) | 3.716 | 2.311 (<20) | 0.0 (20)    | 0.0 (40)   | 0.0 (2560) | 0.0 (2560) |       |      |  |
| 705   |                        | 3.922 (<20)                                                          | 5.766 | 5.930 (<20) | 3.436 | 0.0 (20)    | 0.0 (80)    | 0.0 (80)   | 0.0 (2560) | 0.0 (640)  |       |      |  |
| MA123 | 1° DENV-2<br>3 months  | 4.913 (<20)                                                          | 5.495 | 6.240 (<20) | 3.012 | 0.0 (<20)   | 0.0 (20)    | 0.0 (40)   | 0.0 (2560) | 0.0 (320)  | 21    | 5.25 |  |
| MA023 |                        | 5.419 (<20)                                                          | 5.922 | 5.815 (<20) | 4.575 | 0.0 (20)    | 0.0 (<20)   | 3.252 (80) | 0.0 (2560) | 0.0 (1280) |       |      |  |
| MA029 |                        | 4.684 (<20)                                                          | 6.049 | 6.041 (<20) | 4.568 | 2.748 (<20) | 2.915 (20)  | 0.0 (40)   | 0.0 (1280) | 0.0 (1280) |       |      |  |
| MA062 |                        | 4.064 (<20)                                                          | 5.806 | 5.820 (<20) | 5.460 | 3.802 (<20) | 0.0 (<20)   | 2.639 (80) | 0.0 (2560) | 0.0 (640)  |       |      |  |
| MA067 | Naïve                  | 5.255 (<20)                                                          | 6.049 | 5.488 (<20) | 4.260 | 4.281 (<20) | 1.968 (20)  | 2.09 (40)  | 0.0 (1280) | 0.0 (1280) | 37    | 6.16 |  |
| MA068 |                        | 3.546 (20)                                                           | 4.742 | 4.271 (<20) | 3.542 | 0.0 (<20)   | 2.120 (<20) | 0.0 (40)   | 0.0 (640)  | 0.0 (1280) |       |      |  |
| BZ34  |                        | 4.795 (<20)                                                          | 6.071 | 6.176 (<20) | 4.481 | 3.766 (<20) | 1.946 (20)  | 2.037 (40) | 0.0 (2560) | 0.0 (640)  |       |      |  |
| MA141 |                        | 5.536 (<20)                                                          | 6.123 | 5.907 (<20) | 4.296 | 0.0 (20)    | 2.079 (<20) | 2.127 (40) | 0.0 (2560) | 0.0 (1280) |       |      |  |
| MA143 |                        | 4.127 (<20)                                                          | 5.510 | 5.754 (<20) | 5.158 | 3.657 (<20) | 0.0 (20)    | 0.0 (20)   | 0.0 (2560) | 0.0 (1280) |       |      |  |
| MA085 |                        | 4.324 (<20)                                                          | 5.428 | 4.527 (<20) | 4.401 | 3.835 (<20) | 3.545 (20)  | 2.573 (40) | 0.0 (2560) | 0.0 (640)  |       |      |  |

179 \*ZIKV Neutralizing antibodies were tested at baseline and days 3, 5, 6, 7, 30 and 60.

180 **Table 1. ZIKV RNAemia days of naïve and DENV-immune macaques.** ZIKV RNA detection  
181 was consistent in all groups during the first 4 days post infection (p.i.). Peak viremia occurred on  
182 day 3 p.i. Cohort 1 animals had no detection of ZIKV RNA in serum by day 6 p.i. Mean viremia  
183 days per group was calculated using days with detectable RNAemia divided by the number of  
184 animals in each group.

185

186 **Serological profile is modified by the time between the two infections.** To assess the  
187 impact of previous exposure to DENV at different times in a humoral response against a  
188 subsequent ZIKV infection, all sixteen animals were tested for binding antibodies against ZIKV  
189 and DENV serotypes following ZIKV infection. All three groups had levels of anti-DENV IgM  
190 below the cutoff value during the three collection periods, suggesting ZIKV infection did not  
191 induce DENV-specific IgM response (Fig. S3A). As expected, all DENV immune animals had  
192 detectable IgG levels against DENV at baseline (Fig. S3B). Anti-DENV IgG levels were  
193 confirmed in both DENV-pre-exposed groups and by day 30 experimented a significant  
194 expansion compared to their basal levels ( $P < 0.05$ ; mean diff: -0.27, CI95% -0.5145 to -0.02546  
195  $P < 0.005$ ; mean diff: -0.3, CI95% -0.4997 to -0.1003 for the DENV3M and DENV12M groups  
196 respectively). Those cross-reacting antibodies were also significantly higher compared to the  
197 naïve animals on day 30 ( $P < 0.0001$ ; mean diff.: 0.96, CI95%: 0.61 to 1.30 for DENV 12M vs  
198 naïve at 30 days p.i.;  $P < 0.0001$ ; mean diff.: 0.75, CI95%: 0.37 to 1.14 for DENV 3M vs naïve at  
199 30 days p.i.;  $P < 0.0001$ ; mean diff.: 0.88, CI95%: 0.54 to 1.23 for DENV 12M vs naïve at 60 days



200 p.i.;  $P < 0.001$ ; mean diff.: 0.68, CI95%: 0.29 to 1.07 for DENV 3M vs naïve at 60 days p.i.),  
201 slowly decreasing by day 60 p.i. (Fig. S3B). After a limited increase of the anti-DENV IgG levels  
202 on day 30 p.i. the levels rapidly decrease by day 60 in the naïve group. Moreover, by day 30  
203 p.i., DENV-middle convalescent animals showed a strong trend of having higher levels of anti-  
204 DENV IgG compared to the DENV-early convalescent animals, although no statistical  
205 significance was reached.

206 As expected, all ZIKV-infected animals developed anti-ZIKV IgM 30 days after the infection (Fig.  
207 S3C). However, those antibodies were early detected only in three animals from the DENV12M  
208 group with two subjects showing a peak on that day (5O8, 1O1) (Fig. S3C). All DENV-immune  
209 animals had detectable levels of anti-ZIKV IgG at baseline compared to the naïve animals,  
210 suggesting a strong cross-reactivity between previously generated anti-DENV IgG to ZIKV (Fig.  
211 S3D). DENV-early convalescent animals had significantly higher levels of anti-ZIKV IgG than  
212 the other DENV-immune animals (DENV12M) at baseline ( $P < 0.05$ ; mean diff.: -0.59, CI95%: -  
213 1.15 to -0.05). By day 7 p.i., DENV-immune animals have higher levels of anti-ZIKV IgG that  
214 increase throughout days 30 and 60 p.i.. Similar but slower increase was detected in the naïve  
215 group. Nonetheless, all three groups showed a boost in anti-ZIKV IgG levels by day 30 p.i. with  
216 a significant expansion at day 60 only in the DENV-immune animals ( $P < 0.0001$ ; mean diff.: -  
217 1.187, CI95%: -1.848 to -0.525 and  $P < 0.0001$ ; mean diff.: -1.176, CI95%: -1.716 to -0.636 for  
218 DENV3M and DENV12M groups respectively (Fig. S3D). However, all animals except one in the  
219 naïve group also experiment a significant expansion in their level of anti-ZIKV IgG by day 60  
220 compared to day 30 ( $P < 0.0001$ ; mean diff.: -1.231, CI95%: -1.771 to -0.691).

221 Only one animal from the DENV-early convalescent group (MA062) had very low but detectable  
222 anti-ZIKV NS1 IgG levels at baseline (Fig. S3E). All ZIKV-infected animals showed a boost in  
223 anti-NS1 levels by day 30 p.i., with DENV-middle convalescent group having significantly higher  
224 levels compared to early convalescent and naïve animals ( $P < 0.01$ ; mean diff.: 1.05,  
225 CI95%: 0.2608 to 1.836 for DENV12M vs. DENV3M;  $P < 0.0001$ ; mean diff.: 2.15, CI95%: 1.45 to  
226 2.859 for DENV12M vs naïve). These levels decreased by day 60 p.i., and the drop is more  
227 dramatic in the pre-immune animals (Fig. S3E). Antibodies against ZIKV EDIII were also  
228 measured in order to determine their contribution to humoral immunity and for their known  
229 specific contribution to ZIKV neutralization 25 (Fig. S3F). Only one animal from the DENV-middle  
230 convalescent group showed detectable levels of anti-ZIKV EDIII before ZIKV infection. Anti-  
231 ZIKV EDIII levels for all groups slowly increased throughout 30 and 60 days p.i., and the  
232 increase at day 60 p.i. was significant for DENV-immune animals with respect to their basal

233 levels ( $P < 0.05$ ; mean diff.: -0.85, CI95%: -1.68 to -0.03 for DENV12M animals, and  $P < 0.001$ ;  
234 mean diff.: -1.26, CI95%: -2.27 to -0.25 for DENV3M animals). No significant differences were  
235 observed among the groups, suggesting that previous exposure to DENV does not have an  
236 impact on the generation of cross-reactive antibodies against ZIKV EDIII epitopes and that  
237 these antibodies may have limited contribution to ZIKV neutralization.

### 238 **The time between DENV/ZIKV infections modifies the neutralizing profile.**

239 To determine the contribution of binding antibodies to the neutralization and the impact of a  
240 previous DENV infection in a subsequent ZIKV infection in terms of neutralization potential, all  
241 three groups were tested using PRNT and FRNT assays against ZIKV and the four DENV  
242 serotypes respectively. Neutralization assays were completed for baseline, days 30 and 60 for  
243 DENV and ZIKV. To better understand if the previous DENV immunity plays a role in the  
244 neutralization of ZIKV, we also ran PRNT assay for days 3, 5, 6 and 7. The endpoint titers are  
245 showed in Table 1 along with the viremia set point values in order to facilitate a better  
246 interpretation of the relationship between both parameters.

247 In figure 4 the 50% effective concentration (EC) of neutralizing antibodies is shown. As  
248 expected, all three groups had low or absent neutralizing antibodies against ZIKV at baseline  
249 (Fig. 4A). As early as 6 days after the infection an increase in the neutralizing activity against  
250 ZIKV is detected in all groups with a slight non-significant trend to be higher in the DENV12M  
251 group. This increase continues on day 7 with the trend to be higher in both preimmunized  
252 groups. By day 30 p.i., neutralizing titers had boosted in the three groups, with DENV-middle  
253 convalescent animals showing a slight trend towards higher levels of dilution effective for half-  
254 maximum neutralization compared to DENV3M and naïve groups. These levels decline slightly  
255 by day 60 p.i but still maintained a similar relation among groups (Fig. 4A). In order to expand  
256 our analysis of the contribution of the humoral immune response to the early viral replication we  
257 further looked at the dilution:neutralization capacity relation in samples from all timepoints. As  
258 shown in figure 4C, we identified significant differences, at the highest serum concentrations in  
259 the magnitude of the neutralization (only dilutions showing more than 60% of neutralization were  
260 considered) on days 6 ( $P < 0.001$  and  $P < 0.029$  for DENV12M and DENV3M vs. naïve  
261 respectively at 1:20 dilution and  $P = 0.0005$  and  $P < 0.0001$  for DENV12M vs. DENV3M and naïve  
262 respectively at 1:40 dilution) and 7 ( $P < 0.0039$  and  $P < 0.0001$  for DENV-12M vs. naïve at 1:20  
263 and 1:40 dilutions respectively) p.i.. However, the role of the neutralization limiting viral  
264 replication, particularly at day 6 after the infection, is debatable when the relationship between  
265 RNAemia and end point neutralizing titers are analyzed together (Table 1).

266 Both DENV immune groups had high levels of neutralizing antibodies against DENV2 at  
267 baseline, which boosted significantly for DENV12M animals at day 30 p.i. compared to the naïve  
268 group (Fig. 4B). By day 60 p.i., these neutralizing antibodies did not decline in neither of the  
269 DENV immune groups, and a significant difference was still present for DENV-middle  
270 convalescent animals, which suggests that ZIKV infection induced a boost in cross-neutralizing  
271 antibodies to DENV and the magnitude of the boost depend on the time elapse between DENV  
272 and ZIKV infection ( $P=0.0006$  for day 30 p.i. and  $P=0.02$  for day 60 p.i.). Only one naïve animal  
273 produced low level of neutralizing antibodies against DENV2 by day 30 p.i. that declined by day  
274 60 p.i. (Fig. 4B). Using the anti-ZIKV IgG data presented on the previous section (Fig. S3D), we  
275 can conclude that the expansion 60 days p.i. is supported in cross-reactive non-neutralizing  
276 antibodies (Fig. 4). Detailed dilution end points for each animal are shown in Figure S4, panels  
277 A and B.

278 When evaluating the neutralizing titers against the all four DENV serotypes, we observed a  
279 boost in neutralization against all serotypes in all three groups, suggesting that a subsequent  
280 ZIKV infection impact the levels of heterologous DENV-neutralizing antibodies (Fig. S5A,B).  
281 Interestingly 30 days after ZIKV infection there was a non-significant trend to higher neutralizing  
282 titers against DENV2 and DENV4 compared to the other two DENV serotypes in the DENV  
283 naïve group. The hierarchy of neutralizing antibodies generated 30 days p.i. was the same for  
284 both DENV immune groups ( $D2>ZIKV>D4>D3>D1$ ), and for the naïve group it was  
285  $ZIKV>D4>D2>D3>D1$  (Fig. S5B). In order to determine if there were any strain-specific  
286 neutralization differences, neutralization assays were performed at 30 days p.i. against two  
287 recently circulating contemporary ZIKV strains, ZIKVH/PF/2013 and ZIKVPRVABC-59. As  
288 showed in figure S5C, no differences in the neutralization magnitude were seen for any group.  
289 Altogether, these results confirm the contribution of pre-existing DENV immunity to the  
290 expansion of cross-reactive anti-ZIKV IgG levels and of the DENV cross-neutralizing antibodies  
291 early after ZIKV infection in macaques.

292 **Immune cell subsets frequency is shaped by previous DENV exposure.** To establish how  
293 previous immunity to DENV shapes the cellular response against a subsequent ZIKV infection,  
294 an analysis of the involved cells was performed. Animals exposed to DENV three months earlier  
295 had significantly higher frequency of B cells (CD20+) 24 hours before ZIKV infection compared  
296 to the other groups ( $P<0.05$ ; mean diff.: -12.33, CI95%: -22.69 to -1.979 for DENV3M versus  
297 DENV12M, and  $P<0.01$ ; mean diff.: 14.77, CI95%: 4.41 to 25.12 for DENV3M versus naïve  
298 group). No other differences between groups were detected, although the trend observed in day

299 0 is maintained through day 3 (Fig. S6A). On the other hand, the frequency of activated B cells  
300 (CD20+CD69+) was very similar in all three groups (Fig. S6B). In addition, we characterized the  
301 CD4+ and CD8+ T cells central memory (TCM) and effector memory (TEM) subsets in order to  
302 determine how a previous DENV infection impacts the differentiation to these compartments.  
303 The frequency of TCM CD4+ cells (CD4+CD3+CD28+CD95+) was significantly lower for the  
304 DENV-middle convalescent group compared to the DENV-early convalescent and naïve groups  
305 at baseline ( $P<0.05$ ; mean diff.: -19.39, CI95%: -33.23 to -5.35 versus DENV 3M and  $P<0.05$ ;  
306 mean diff.: -19.5, CI95%: -31.97 to -7.03 versus naïve), day 1 p.i. ( $P<0.05$ ; mean diff.: -14.53,  
307 CI95%: -28.47 to -0.59 versus DENV 3M and  $P<0.05$ ; mean diff.: -1.77, CI95%: -14.23 to 10.7  
308 versus naïve) and day 3 p.i. ( $P<0.05$ ; mean diff.: -22.97, CI95%: -36.9 to -9.03 versus DENV  
309 3M, and  $P<0.05$ ; mean diff.: -17.22, CI95%: -29.68 to -4.75 versus naïve) (Fig. S7A). On the  
310 other hand, the frequency of TEM CD4+ cells (CD4+CD3+CD28-CD95+) was increased before  
311 ZIKV infection and remained steady throughout the four timepoints for the DENV-middle  
312 convalescent animals, in comparison with the other two groups. Referring to the CD8+ TCM and  
313 TEM cells, a similar trend can be observed, although it only reaches statistical significance at  
314 day 3 p.i. for TCM cells ( $P<0.05$ ; mean diff.: -9.85, CI95%: -17.02 to -2.68 versus naïve  
315 animals), and at day 1 p.i. for TEM cells ( $P<0.05$ ; mean diff.: 19.57, CI95%: 0.09 to 39.04  
316 versus DENV 3M animals) (Fig. S7B). Additionally, naïve animals had significantly higher levels  
317 of TCM CD8+ cells compared to the DENV immune groups at baseline ( $P<0.05$ ; mean diff.: -  
318 15.47, CI95%: -22.63 to -8.30).

319 We noticed a trend that is especially prominent in DENV-middle convalescent animals, of higher  
320 TEM cell and lower TCM cell frequencies. In order to scrutinize this pattern, we analyzed the  
321 pattern of frequency in each group separately (Fig. S7C,D). Compared to their baseline values,  
322 only naïve animals had significant differences on days 1 through 3 p.i. between CD4+ and  
323 CD8+ TEM and TCM subsets ( $P<0.05$ ). Additionally, the naïve animals go through a sudden  
324 contraction of TCM CD4+ and CD8+ cells at day 1 p.i. that slowly begins increasing by day 3 p.i.  
325 ( $P<0.05$ ). Similarly, the TEM CD4+ and CD8+ cells expand, although TCM cells reach parallel  
326 levels by day 3 p.i. ( $P<0.05$ ). This phenomenon can be seen in DENV 3M animals in the TCM  
327 CD8+ cells during day 1 p.i., but not TCM CD4+ cells. DENV 12M animals go through the same  
328 occurrence, but reaching statistical difference in all three days p.i. ( $P<0.05$ ) (Fig. S7C,D). These  
329 results are confirmed by the pattern showed by individual animals showing that DENV-middle  
330 convalescent animals had a more pronounced TEM cell expansion and TCM cell contraction  
331 compared to their DENV-early convalescent counterparts (Fig. S8). Noticeable, this contraction  
332 of TCM cells and expansion of TEM CD4+ T cells, while it is not antigen specific, translate into a

333 more efficient viremia control in the 12M group but not in the naïve or DENV 3M groups, (Fig  
334 5A,B). Following this, we wanted to compare the level of activation and proliferation of those cell  
335 subsets. We found that DENV-early convalescent group had significantly lower proliferation  
336 levels of CD4+ TCM cells at day 2 p.i. compared to the other two groups (Fig. S9A) and there  
337 were no other significant variations observed in terms of proliferation (Fig. S9A-D). In contrast,  
338 same group of animals showed a trend to higher activation levels of CD4+ and CD8+ TCM and  
339 TEM cells in comparison with the other two groups, although no statistical differences were  
340 found (Fig. S9E-H). These findings suggest that the time lapse between DENV and ZIKV  
341 infections shapes the cellular immune response against ZIKV.

342

343 **T cell immune response is boosted by the time lapse between DENV/ZIKV infections.** To  
344 assess if a previous DENV infection has an impact on the T cell response to a ZIKV infection,  
345 their effector responses were measured. CD4+ and CD8+ T cells produced IFN $\gamma$ , TNF $\alpha$ , and  
346 CD107a in response to various stimuli (Fig. 6A-B). The IFN $\gamma$  response in the CD4+ T cells from  
347 the DENV 12M group before ZIKV infection is remarkable. The frequency of these cells was  
348 significantly higher in response to the whole inactivated DENV ( $P < 0.05$ ) and showed a strong  
349 trend to have a higher frequency of IFN $\gamma$  producing cells in response to peptides derived from  
350 the DENV and ZIKV envelopes and ZIKV non-structural proteins as well compared to the 3M  
351 and naïve groups.

352 DENV 12M animals had also a significantly higher frequency of CD107a+ cells prior to ZIKV  
353 infection ( $P < 0.0001$ ; mean diff.: -0.8775, CI95%: -1.25 to -0.503), while a significant increase in  
354 reactivity of CD107a+ CD4+ cells was observed against ZIKV envelope and non-structural  
355 antigens 30 days p.i. ( $P < 0.05$ ; mean diff.: -0.4421, CI95%: -0.8616 to -0.02263 and  $P < 0.05$ ;  
356 mean diff.: -0.8775, CI95%: -1.251 to -0.5035, respectively) (Fig. 6A). These results correlate  
357 with the protective effect observed in this group (Fig. 6A). Nothing remarkable was observed in  
358 TNF $\alpha$  CD4+ frequency. In contrast, data from CD8+ T cells denote similar responses between  
359 DENV immune animals, with no significant variations compared to the naïve animals (Fig. 6B).  
360 This suggests that previous DENV immune status preferentially shapes the CD4+ T cells  
361 effector responses to a ZIKV infection. Gating strategy is provided as supplementary figure 10.

362

363 **Pro-inflammatory cytokines are not exacerbated by previous DENV immunity.** Next we  
364 determined how DENV immunity impacts the cytokine secretion during a subsequent ZIKV

365 infection (Fig. 7). Naïve macaques had significantly higher levels of pro-inflammatory cytokine  
366 IFN- $\alpha$  on day 1 p.i. compared to the other groups ( $P < 0.05$ ; mean diff.: -145.6, CI95%: -271.7 to -  
367 19.37) (Fig. 7A). This trend continued through the rest of the collection period, but no other  
368 significant differences were detected. DENV 12M animals had seemingly higher levels  
369 compared to their DENV 3M counterparts, although no statistical significance was reached. A  
370 similar event can be observed with CXCL10, where naïve animals had a significant boost by  
371 day 1 p.i. in comparison with the other two DENV-immune groups, although a dramatic drop  
372 occurs on the following 24 hrs ( $P < 0.05$ ; mean diff.: -533, CI95%: -22.69 to -1.98) (Fig. 7B). On  
373 day 2 the levels of CXCL10 increase prominently on the DENV immune animals, noticeably  
374 higher and more consistent on the DENV 12M group, but no significant differences are noted.  
375 This same group of DENV-middle convalescent animals showed a trend towards higher MIP-1 $\alpha$   
376 levels, reaching significant differences in day 5 and 7 p.i. ( $P < 0.01$ ), while naïve animals showed  
377 an increase in MIP-1 $\beta$  levels by day 1 p.i. ( $P < 0.01$ ), followed by a sudden drop (Fig. 7C and D,  
378 respectively). Likewise, an increase in IL-1 $\alpha$  levels, which is considered an inflammatory  
379 marker, was detected in naïve animals at day 1 p.i. that is significantly higher than levels in  
380 DENV-immune animals ( $P < 0.01$ ; mean diff.: -1723, CI95%: -3060 to -385.1 versus DENV 12M;  
381  $P < 0.01$ ; mean diff.: -1809, CI95%: -3305 to -313.18 versus DENV 3M), but it decreases in the  
382 next 24 hours (Fig. 7E). On the other hand, a significant increase in BAFF levels at day 5 p.i.  
383 was observed in DENV 12M animals ( $P < 0.05$ ; mean diff.: -3044, CI95%: -5999 to -87.73) (Fig.  
384 7F). Interestingly, animals exposed to DENV 12 months before ZIKV infection showed higher  
385 levels of circulating perforin, reaching a significant difference compared to the other two groups  
386 at day 7 p.i. ( $P < 0.05$ ; mean diff.: -419.9, CI95%: -824.2 to -15.68) (Fig. 7G). This result supports  
387 a role for perforin cytotoxicity in early viral clearance.

388

389 **Other immune cell responses.** Plasmacytoid dendritic cell (pDCs) frequency could not be  
390 measured on baseline and day 1 and 2 p.i. due to a staining problem. Nonetheless, day 3 p.i.  
391 data presents no detectable differences in the frequency of dendritic cells of pDC lineage or  
392 absolute pDCs between groups (results not shown). In contrast, dendritic cells of myelocytoid  
393 lineage (mDCs) show a significant increase in frequency at days 1 and 2 p.i. in DENV 12M  
394 animals ( $P < 0.01$ ; mean diff.: 10.54, CI95%: -2.65 to 18.43 for DENV 12M versus naïve animals  
395 on day 1 p.i.; for day 2 p.i.,  $P < 0.01$ ; mean diff.: 13.68, CI95%: 4.87 to 22.50 for DENV 12M  
396 versus DENV 3M and,  $P < 0.0001$ ; mean diff.: 15.57, CI95%: 7.68 to 23.45 for DENV 12M versus  
397 naïve animals)(Fig. S11). This suggests that an early activation of mDCs induced by previous

398 immunity to DENV correlates with ZIKV control. This result is coherent with previous finding that  
399 CXCL10 (Fig. 7B) frequency was higher in DENV immune animals after day 2 p.i., especially in  
400 those exposed to DENV 12 months before, supporting control of viremia in this group.

## 401 Discussion

402 It is well established that exposure to DENV prior to a ZIKV infection results in a qualitative  
403 modification of the humoral and cellular immune response to ZIKV in mice, macaques and  
404 humans (24, 26-29). However, we know from early human temporal challenge studies with  
405 multiple serotypes of DENV that the timing between flavivirus exposure can alter the balance  
406 between heterologous immune pathogenesis and protection. In human populations living in  
407 flavivirus endemic areas, it is difficult to establish the exact time of a primary infection and  
408 more difficult to establish the time between two consecutive infections.

409 Macaques provide a robust model to study the immunological profile after sequential flavivirus  
410 infections (24, 30, 31). Using the macaque model allows among other factors, to normalize  
411 the quantity of viral inoculum, the age, and sex of the animals exposed, and the timing of the  
412 infection. Controlling the timing of exposure between heterologous flavivirus infections allows  
413 for the measurement of the impact of time on the immune response to the second infecting  
414 agent. These studies are important not only for understanding the impact duration of  
415 exposure of heterologous natural flavivirus infections in endemic areas but also provides a  
416 model to evaluate possible pan-flavivirus protective windows for vaccine candidates.

417 Previously we have shown that a DENV infection 2.8 years (late convalescence period) prior did  
418 not lead to an enhanced ZIKV infection. Moreover, that period of convalescence results in an  
419 immune status that trends toward the control of ZIKV viremia and the decrease of liver enzymes  
420 after the infection. Differences were also observed in B-cells and T-cells activation and  
421 cytokines and chemokines profile (24). Our previous results have been recently validated in a  
422 meta-analysis using most of the NHP available data (32) and more relevant, in two studies  
423 presenting real settings of humans living in DENV-endemic areas (32-34). In this work, we  
424 aimed to establish the contribution of different DENV convalescent periods (3 months or early  
425 and 12 months or middle convalescent periods) on the immune response and disease course  
426 after ZIKV infection. From our results, we confirmed that the length of time after DENV infection  
427 significantly impacts ZIKV infection and pathogenesis by limiting an increase in body  
428 temperature, controlling viremia, and mitigating liver-induced damage.

429 It is well documented that secondary flavivirus infections, including ZIKV, lead to an increase in  
430 cross-reactive Abs and nAbs (28, 35-37). We found a transient but significant expansion in the  
431 magnitude of the DENV cross-reactive Abs in the pre-immune groups 30 days after ZIKV  
432 infection with a rapid decline by day 60. We also confirmed the preexistence of cross-reacting



433 but non-neutralizing antibodies to ZIKV in the DENV-immune groups (35, 36). However, those  
434 antibodies were significantly higher only in the DENV-early convalescent group compared to the  
435 middle convalescent group. This confirms the high frequency of ZIKV cross-reacting antibodies  
436 during the early DENV convalescence that wane during the middle and late convalescent  
437 periods (35, 37). Similarly, the levels of the antibodies to NS1 was significantly higher in the  
438 group with a middle convalescent period to DENV compared to the other two groups suggesting  
439 the presence of more mature memory B cells in this group in comparison with the other DENV  
440 immune group. Cumulatively from our previous results(24) and this current work, we can  
441 conclude that the neutralization against ZIKV is very limited or absent in all samples we tested  
442 after DENV and before ZIKV infections, regardless of the convalescence status. Our results are  
443 in agreement with recent findings by Montoya et al. (37) and in partial agreement with other  
444 reports using human samples (35, 38-40). The discordance may be related to the differences in  
445 the definition of the convalescence period in those previous works.

446 Taking advantage of our model we completed a detailed analysis between the nAbs and the  
447 RNAemia within the first week of ZIKV infection that otherwise would be difficult to conduct in  
448 humans' cohorts. While we identified a significant decline in the viremia set-point on day four in  
449 the DENV-12M group only, starting from day 5 to 7 we characterized a limited increase in the  
450 magnitude of ZIKV neutralization activity in the DENV12M group. That early increase was  
451 characterized by the presence of low-to-intermediate levels of neutralizing antibodies but no  
452 correlation can be made with the viremia on days 5 and 6. However, by day 7, only in the  
453 animals with DENV-middle convalescence immunity a consistent increase in the ZIKV  
454 neutralizing antibodies correlating with the absence of RNAemia was observed only in the  
455 animals with DENV-middle convalescent immunity. This result suggests that the humoral  
456 immune response in subjects with previous DENV-immunity may contribute to controlling ZIKV  
457 replication around one week after the infection. However, the time elapsed between the DENV  
458 and ZIKV exposures seems to be a critical factor for that contribution. This result contrast we  
459 results from our group suggesting that low-to-intermediary levels of cross-NAbs against DENV  
460 induced by a previous ZIKV infection may play a role in controlling the early DENV RNAemia set  
461 point (41).

462 As we discuss below, other mechanisms, most likely associated with the preexisting DENV-  
463 induced cellular immune response may be relevant providing the initial control of ZIKV  
464 replication. Our findings on the neutralizing activity against ZIKV in the presence of DENV  
465 immunity are in agreement with previous works with human mAbs confirming an early

466 expansion of the plasmablast response 6 days after secondary DENV (42, 43) and primary  
467 ZIKV infection (44). Particularly interesting is our finding in the DENV12M group characterized  
468 by the increase in ZIKV neutralization activity and an early peak of IgM by day 7 in some  
469 animals. Previously Lai. et al confirmed that the early expansion of the antibody-secreting B  
470 cells secretes ZIKV-specific immunoglobulins G, A but also M (45). Moreover, germinal centers  
471 (GC) are responsible for generating long-lived, high-affinity Antibody Secreting Cells (ASC) that  
472 in turn are able to generate a better-quality response against re-infections (46). Interestingly, our  
473 results show a significant increase in BAFF level (a key factor in germinal center maintenance,  
474 B cell maturation, and antibody production) at day five for the animals exposed to DENV 12  
475 months earlier, suggesting a GC response involvement in this group.

476 This new information fills a current gap in our understanding of the early immune response to  
477 ZIKV in the presence of previous DENV immunity and have enormous implications for the  
478 diagnostic interpretation and the epidemiological considerations during a flavivirus epidemic and  
479 to properly dissect the immune response to ZIKV. A significant body of research has been  
480 published so far and seminal conclusions have been drawn without considering the length of  
481 time between primary and secondary flavivirus infection. The above-discussed results provide  
482 novel insights into the dynamic of the antibodies response to ZIKV in a population previously  
483 exposed to DENV.

484 One of the most important questions still remaining is the role of time between DENV and ZIKV  
485 exposure in the protective capacity of the memory T and B cell responses over time. As the time  
486 between ZIKV and DENV exposure can vary from months to years, we used our established  
487 NHP model of heterologous flavivirus exposure (24) to understand the phenotype of T cells and  
488 their protective capacity following heterologous flavivirus infection. Uniquely, we determined that  
489 the magnitude and the breadth of the cellular immune response were dependent on the  
490 convalescent status with significant consequences. Our study suggests that TEM cells may play  
491 a role in controlling ZIKV early set point viremia and as consequence contributing to mitigate the  
492 liver damage before the neutralizing antibodies may be effective after a period of mid  
493 convalescence, defined on this work as 12 months. That group showed a significantly higher  
494 frequency of pre-existing TEM CD4+CD3+CD28-CD95+ cells prior to and continue expanding  
495 until day 3 (the last time point tested) after ZIKV infection. Particularly relevant is the significant  
496 preexistent combination of high TEM and lower TCM cell frequencies in this group exposed to  
497 DENV 12 month prior to ZIKV infection. One caveat of this analysis is that the increase in the  
498 frequency of the CD4+ TEM cells observed was not antigen-specific. But the increase from

499 baseline to day 3 was sustained and expanded after ZIKV infection and that expansion  
500 correlates with the significant ZIKV set point viremia decrease starting on day 5 after the  
501 infection. Protective memory is thought to be mediated by TEM cells that migrate to inflamed  
502 peripheral tissues and display immediate effector functions, whereas T central memory (TCM)  
503 cells have limited effector function early but have maintained their proliferative capacity (47).  
504 Circulating TCM and TEM cell populations can be detected up to 10 years after antigenic  
505 stimulation, and their presence correlates with protection as their frequencies increase following  
506 booster immunization (48).

507 A limited but statistically significant proliferation of the CD4+ TCM cells was noted two days  
508 after the infection only in the naïve and 12M DENV-immune groups compared to the 3M DENV-  
509 immune group. However, proliferating CD4+ and CD8+ T-cells have been reported by 6–8 days  
510 post-ZIKV infection (30, 49, 50). Unfortunately, as a consequence of the devastating impact of  
511 hurricane Maria, we were unable to collect samples from day 7 until day 30 p.i. in our cohorts.  
512 However, from the time points we were able to analyze after ZIKV infection we detected a  
513 contraction of the TCM and an expansion of the TEM respectively in naive animals for both the  
514 CD4+ and CD8+ T cells compartments, strongly suggesting that the changes in magnitude in  
515 those types of cells were specific for ZIKV infection. Of note, the expansion and the contraction  
516 of the CD4+ TEM and TCM respectively, were significant compared to their baseline values only  
517 in the naïve groups but it was insufficient for effective control ZIKV viremia or to limit the hepatic  
518 insult.

519 Worth to mention, the number of the memory T cells in our model, in spite of the shift from one  
520 phenotype to other (TCM>TEM), remains relatively constant over the time in all groups, which is  
521 consistent with the proposed mechanism of T cell memory homeostasis (51).

522 In this study, we are able to combine our previous insights into the role of TCM and TEM cells  
523 on prior heterologous flavivirus infection (24) to our current work on the temporal boundaries of  
524 immune protection from a heterologous flavivirus infection. From our work, the role of the  
525 cellular immune response in facilitating the initial significant decrease of ZIKV replication  
526 between days 4 to 7 is very likely. The group challenged with ZIKV 12 months post-DENV  
527 infection was better at controlling ZIKV viremia, together with lower levels of the liver enzyme  
528 AST compared to the naïve group.

529 This time-dependent effect has been previously well characterized for the humoral immune  
530 response to secondary DENV infections (15, 17, 52). While the transition from central to effector

531 and memory phenotype is a complex and progressive process, the limited response observed in  
532 the DENV-early convalescence group may be related to a possible ongoing period of T cells  
533 contraction (53) after the clearance of the primary DENV occurs only 3 months earlier. Boosting  
534 with a homologous alphavirus replicon before the cell's contraction period was completed, did  
535 not further increase the T cell response in a mice model (54). After YFV and vaccinia virus  
536 vaccination in humans, the period of time of T cells contraction is still ongoing around 84 days  
537 after vaccination (55). That period of time is similar to the 90 days for the secondary challenge  
538 with ZIKV in the DENV3M group. The presence of a mature immune response as a  
539 consequence of a previous stimulus 12 months earlier, may explain the contribution of the  
540 CD4+ T cells detected in the DENV-middle convalescence group that otherwise is not present in  
541 the DENV3M group with limited immune response capabilities or in the naïve group in response  
542 to a primary viral infection.

543 In addition, the cytotoxic profile of the CD4+ T cells present 12 months after DENV infection and  
544 during heterologous ZIKV challenge correlate with better performance relative to the early (3  
545 months) or late (2.5 years) (24) periods of time after the primary DENV infection. The role of  
546 CD4+T cells in flavivirus infection has been extensively documented (56) (57). Importantly,  
547 Weiskopf et al. and others have also shown that DENV CD4+T cells are readily detectable early  
548 following DENV infection, and the frequency of DENV-specific CD107a+ CD4+T correlate with  
549 enhanced protection against DENV disease (58, 59) and play a key role in controlling secondary  
550 flavivirus infections (26). Our work builds on these observations and demonstrates that the  
551 frequency of CD107a+ CD4+T cells from DENV immune NHPs, prior to ZIKV infection  
552 correlates with enhanced protection from ZIKV challenge. We also noted that DENV specific  
553 CD4+T cells isolated one year after DENV infection was highly responsive to the whole DENV  
554 virus prior to ZIKV infection (characterized by a significantly higher frequency of IFN-g  
555 production and CD107a expression). Also, this group showed a strong trend to higher frequency  
556 of reactivity compared to the other two groups, after the other stimulus including the whole  
557 ZIKV, ZIKV and DENV envelope and ZIKV nonstructural proteins. Actually, after 30 days of  
558 infection the focus of CD4+ T cells reactivity was ZIKV envelope and non-structural antigens.  
559 That switch was a trend, but not significant in animals with an early period of convalescence to  
560 DENV. Interesting it has been shown that a higher frequency of DENV-specific IFN-g producing  
561 T cells are associated with subclinical manifestations in children suffering from secondary DENV  
562 infection (60). Our finding on CD4 T cells is consistent with a previous report confirming that  
563 preexisting memory CD4 T cells (and not the CD8 T cells or antibodies) are responsible for  
564 limiting the severity of illness caused by influenza (61). Notably, the data for CD8+T cells did not

565 recapitulate the observations of the CD4+ T cells. We noted relatively similar responses  
566 between the CD8+T cells isolated from the 12M DENV immune compared to the 3M DENV  
567 immune animals. This suggests that the CD4+T cell response changed over time leading to  
568 potential differences in disease.

569 The immunopathogenesis of liver damage induced by DENV infection has been addressed in  
570 human and animal models, but very limited data is available for ZIKV infection or for sequential  
571 DENV/ZIKV or ZIKV/DENV infections. Different immunopathogenic mechanisms like apoptosis,  
572 viral replication, autoantibodies to non-structural proteins, infiltrating Natural Killer and CD8+ T  
573 cells among others, have been postulated as the intrinsic mechanism of DENV-induced liver  
574 damage (62-70). However, there is evidence showing that liver damage is not associated to  
575 DENV virus replication *per se* if not with immunopathogenesis induced after the viral infection  
576 (63). Fernando et al reported that comparing a well-characterized cohort of 33 cases of non-  
577 severe DENV with a group of 22 subjects with severe dengue, the increase of AST, GGT and  
578 ALT peaked up by day 6-7 and did not associate with the degree of viremia or the onset or  
579 extent of fluid leakage. They found that the liver damage was more related to a possible  
580 immune mechanism and associated to higher levels of IL-10 and IL-17 (63). Results from mice  
581 also confirm that liver damage is associated with higher systemic levels of proinflammatory  
582 cytokines, including TNF-alpha and IL-17, and not to DENV replication (64, 67). In fact,  
583 Martinez-Gomez et al showed that anti-TNF-alpha reduce the liver damage significantly without  
584 any impact in the viremia (67). Particularly relevant is the limited elevation of the AST in both  
585 DENV-immune groups compared to the naïve animals and the increase of that enzyme in 5 of 6  
586 naïve animals 6 days p.i. above the normal ranges. That enzyme (AST) has been reported more  
587 frequently elevated and at higher levels than ALT in humans with DENV-induced liver damage  
588 (63, 71-74). We found a limited proinflammatory cytokine profile in the naïve animals that may  
589 explain the significant increase of liver enzymes in that group. On the other hand, we  
590 hypothesize that the limited elevation of liver enzymes in the 3M group at early time point after  
591 ZIKV infection is in agreement with the limited immune activation we are reporting in the first  
592 days after infection in that group, most likely due to the short period of time between  
593 consecutive DENV/ZIKV infections.

594 The significant role of the T cells in controlling ZIKV replication and as consequence limiting the  
595 liver damage in the animals with a DENV-middle convalescence period before ZIKV infection is  
596 reinforced by the significant increase of circulating cytolytic protein perforin at day 7 p.i.. We  
597 hypothesize that this likely represents T cells acquisition of cytotoxic function (75) in that group

598 compared to the other two groups and correlates with the higher expression of CD107a on the  
599 CD4+T cells isolated from the middle convalescent animals. Previously we confirmed a peak in  
600 perforin levels in the serum 6 days after ZIKV infection in animals with 2.8 years of previous  
601 immunity to DENV (24). Others have shown that Granzyme B levels in CD4+ and CD8+ T cells  
602 peaked between 7 and 10 days post-ZIKV infection (50).

603 The protective role of the cellular immune response controlling the viral burden of ZIKV in mice  
604 has been reported (76, 77). More recently mouse models have shown that prior DENV immunity  
605 can protect against ZIKV infection during pregnancy, and CD8+ T cells are sufficient for this  
606 cross-protection (78). Currently, it is well documented that pre-exposure to DENV both in  
607 macaques and humans results in a qualitative modification of the humoral and cellular immune  
608 response to ZIKV (24, 27-29).

609 The uniqueness of our report is that we provide evidence that the magnitude and the breadth of  
610 flavivirus immunity depends not only on pre-infection immune status but time between  
611 exposures, with significantly different protection outcomes. Also, taking advantage of the NHP  
612 model, we are providing a dissection of the early events of the protective immune response. We  
613 are providing mechanistic evidence of the early role of cellular immunity in such protection and  
614 characterized a window of transition to the contribution of the humoral immune response.

615 We are showing that in the presence of previous DENV infection, the increase in the frequency  
616 of the specific TEM cells and of the cytotoxic CD4+ T cells and in the magnitude of ZIKV  
617 neutralization may occur at any time after ZIKV infection. However, playing a significant role  
618 controlling ZIKV viremia and liver damage happens only after a middle-convalescent period of  
619 approximately 12 months, but not too early (3 months) or too late (2.8 years) after the primary  
620 DENV infection. Interestingly a recent report showed that the IgG3 levels (a marker of recent  
621 DENV infection) were positively associated with risk of infection by ZIKV (34). In humans, this  
622 fact correlates with our finding in NHPs that a shorter period of DENV immunity may not provide  
623 same level of protection against ZIKV replication. Another work reporting results from a children  
624 cohort in Nicaragua found that a recent DENV infection was significantly associated with  
625 decreased risk of symptomatic ZIKV infection (33). The definition of recent DENV infection was  
626 precisely about one year before ZIKV infection which is in agreement with 12M of DENV  
627 convalescence we are reporting. We acknowledge that to establish the precise role for the T  
628 cells immune response controlling Zika viremia and pathogenesis, depletion of the specific T  
629 cells subsets is advised, and our group is already working on that direction.

630 From our results we cannot anticipate if the effect of previous DENV immunity or the time  
631 between DENV and ZIKV infection may have any implications during the pregnancy. More  
632 complex studies using a large number of NHPs and well controlled prospective studies in  
633 human populations are needed to elucidate such a relationship (79). Based on other results  
634 from our group, it is possible to argue that the sequence of ZIKV-DENV infections (41) induce a  
635 different immunological response—in terms of the neutralization magnitude, cytokines profile  
636 and functionality of the cellular immune response—compared to the DENV-ZIKV scenario  
637 shown here. However, in both scenarios, the role of the time interval between infections seems  
638 to play a critical role in the quality and quantity of the immune response.

639

640 Our findings have enormous impact for the epidemiological models anticipating the magnitude  
641 of new ZIKV epidemics in DENV endemic areas and are essential for the planning and  
642 evaluation of ZIKV and DENV vaccine schedules, design and monitoring.

643 **Methods**

644 **Viral stock.** ZIKV PRVABC59 strain was obtained from ATCC, BEI Resources (Manassas, VA),  
645 was used in order to compare results to our previously published data. This ZIKV strain  
646 replicates well in rhesus macaques but has a lower viremia peak than ZIKV H/PF/2013 strain.  
647 We aimed to use a strain from the recent epidemic in the Americas region. Virus was expanded  
648 and titered by plaque assay and qRT-PCR using protocols standardized in our laboratories.  
649 DENV-1 Western Pacific 74, DENV-2 New Guinea 44, DENV-3 Sleman 73 and DENV-4  
650 Dominique strains kindly provided by Steve Whitehead (National Institutes of Health, Bethesda,  
651 Maryland) were used for neutralization assays. DENV-2 New Guinea 44 strain was also used to  
652 infect macaques in September 2016 and June 2017.

653

654 **Ethics Statement**

655 All procedures were reviewed and approved by the Institute's Animal Care and Use Committee  
656 at Medical Sciences Campus, University of Puerto Rico (IACUC-UPR-MS) and performed in a  
657 facility accredited by the Association for Assessment and Accreditation of Laboratory Animal  
658 Care (AAALAC) (Animal Welfare Assurance number A3421; protocol number, 7890116).  
659 Procedures involving all study animals were approved by the Medical Sciences Campus, UPR  
660 IACUC and were conducted in accordance with USDA Animal Welfare Regulations, the Guide for  
661 the Care and use of Laboratory Animals and institutional policies. In addition, steps were taken  
662 to lighten sufferings, including use of anesthesia and method of sacrifice if appropriate, in  
663 accordance with the recommendations of the Guide for the Care and use of Laboratory Animals  
664 (8th edition), Animal Welfare Act and the Public Health Service (PHS) Policy on Humane Care  
665 and Use of Laboratory Animals and in accordance with the recommendations of the Weatherall  
666 report, "The use of non-human primates in research: [http://www.acmedsci.ac.uk/more/news/the-  
667 use-of-non-human-primates-in-research/](http://www.acmedsci.ac.uk/more/news/the-use-of-non-human-primates-in-research/). Macaques were continuously monitored by trained  
668 veterinarians at the Animal Research Center and evaluated twice daily for evidence of disease  
669 or injury. Feeding and drinking continued normally during this period. All procedures were  
670 conducted under anesthesia by intramuscular injection of ketamine at 10–20 mg/kg-1 of body  
671 weight, as approved by the IACUC. Anesthesia was delivered in the caudal thigh using a 23-  
672 Gauge sterile syringe needle. During the period of the entire study, the macaques were under  
673 the environmental-enrichment program of the facility, also approved by the IACUC.

674



675 **Immunization and virus challenge of macaques.** Young adult rhesus macaques (4-7 years of  
676 age) seronegative for DENV and ZIKV were housed in the CPRC facilities, University of Puerto  
677 Rico, San Juan, Puerto Rico. For the ZIKV challenge, macaques previously infected with DENV-  
678 2 in September 2016 (Cohort 1, n=6) and June 2017 (Cohort 2, n=4), and DENV/ZIKV-naïve  
679 macaques (Cohort 3, n=6) were infected subcutaneously in the deltoid area with 500uL of virus  
680 diluted in PBS, using a dose of  $1 \times 10^6$  pfu. All macaques were male. The average age for  
681 cohort 1 was 5.1 years (5.6, 4.9, 5.1, 4.9, 5.0 and 5.0 years), 6.8 years for cohort 2 (5.5, 7.75,  
682 7.6 and 6.7 years), and 5.7 years for cohort 3 (6.3, 6.5, 5.8, 4.75, 5.4 and 5.6 years). Weights  
683 were taken on Day 0 and every other day during the acute infection period (days 1–6, then at  
684 day 30 p.i.). Rectal and external temperature were taken daily during the acute infection period  
685 (days 1–6 and on day 30 p.i.). External temperature was recorded using an infrared device  
686 (EXTECH Instruments, Waltham, MA) as per the manufacturer's instructions. Blood and  
687 chemical tests were performed on day 0 and every other day until day 6 p.i.

688

689 **Note on sample collection.** The intended schedule was unexpectedly affected by Hurricane  
690 María. Sample collection programmed from days 7 to 29 p.i. was interrupted due to inability of  
691 access and/or lack of electricity in CPRC facilities in University of Puerto Rico, San Juan, Puerto  
692 Rico.

693

694 **DENV and ZIKV titration and neutralization assays.** For virus titration, Vero81 cells (ATCC  
695 CCL-81) at approx.  $8.5 \times 10^4$  cells/well in 24 well plates with growth medium (Dulbecco's  
696 Modified Eagle's medium, Thermo Fisher Scientific, with 10% FBS (Gibco), 1% non-essential  
697 amino acids (Gibco), 1% HEPES (Gibco), 1% L-glutamine (Gibco) and 1% Pen/Strep (Gibco)).  
698 At around 85% confluency (approx. 24 hours later), ten-fold dilutions of virus were prepared in  
699 diluent medium (Opti-MEM (Invitrogen) with 2% FBS (Gibco) and 1% antibiotic/antimycotic  
700 (HyClone) and added to the wells after removing growth medium. Each virus dilution was added  
701 in 100 mL triplicates, and plates were incubated 1 hour at 37C/5%CO2/rocking. After incubation,  
702 1 mL of overlay (Opti-MEM with 1% Carboxymethylcellulose (Sigma), 2% FBS, 1% non-  
703 essential amino acids (Gibco), 1% antibiotic/antimycotic (HyClone)) was added to the plates  
704 containing viral dilutions, followed by an incubation period at 37C/5%CO2. After 3 to 5 days of  
705 incubation (depending of the virus), overlay was washed away with phosphate buffered saline  
706 (PBS) and fixed with 80% methanol. For ZIKV, cells were stained with crystal violet after fixing.

707 For DENV, plates were fixed then blocked with 5% non-fat dry milk in PBS and incubated for  
708 1hr/37C/5%CO<sub>2</sub>/rocking with anti-E mAb 4G2 and anti-prM mAb 2H2 (provided by Dr. Aravinda  
709 de Silva), both diluted 1:250 in blocking buffer. Plates were washed twice and incubated  
710 1hr/37C/5%CO<sub>2</sub>/rocking with horseradish peroxidase (HRP)-conjugated goat anti-mouse  
711 antibody (Sigma), diluted 1:1,000 in blocking buffer. Foci were developed with TrueBlue HRP  
712 substrate (KPL) and counted. For the Focus/Plaque Reduction Neutralization Test  
713 (FRNT/PRNT), sera were diluted two-fold and mixed with approx. 35 foci per plaque-forming  
714 units (FFU per p.f.u. per mL) of virus and then incubated for 1hr/37C/5%CO<sub>2</sub>/rocking. Virus-  
715 serum dilutions were added to 24 well-plates containing Vero81 cells as mentioned above, and  
716 incubation was continued for 1hr/37C/5%CO<sub>2</sub>/rocking. After incubation, overlay was added, and  
717 the aforementioned procedure was repeated. Mean focus diameter was calculated from approx.  
718 20 foci per clone measured at X5 magnification. Results were reported as the FRNT or PRNT  
719 with 60% or greater reduction in DENV or ZIKV foci or plaques (FRNT60 or PRNT60). A positive  
720 neutralization titer was designated as 1:20 or greater, while <1:20 was considered a negative  
721 neutralization titer.

722

723 **qRT-PCR.** Viral RNA for real-time PCR assay was extracted from 140 µl of virus isolate  
724 (previously titered as described above) and serum samples using Invitrogen PureLink RNA Mini  
725 Kit (Invitrogen, Valencia, CA) as per the manufacturer's instructions. Real-time RT-PCR  
726 (TaqMan) assay-specific primers and probes for ZIKV were designed by Sigma-Aldrich (St  
727 Louis, MO) following the protocol developed by the Molecular Diagnostics and Research  
728 Laboratory Centers for Disease Control and Prevention (CDC), Dengue Branch at San Juan,  
729 PR. RNA from other flaviviruses were included as negative control. For the reaction mixture, 5  
730 µl of RNA was combined with 100 mM primers and 25 mM probe in a 25 µl total volume using  
731 Life Technologies SuperScriptIII Platinum assay kit (Life Sciences). Assays were performed in  
732 an iCycler iQ Real Time Detection System (Bio Rad, CA). For quantification, a standard curve  
733 was generated from ten-fold dilutions of RNA from a known amount of virus.

734 **ELISA for DENV and ZIKV.** Prior to ZIKV challenge, DENV/ZIKV seronegative status of cohort  
735 3 animals was assessed using DENV IgG/IgM and ZIKV NS1 IgG commercial kits (Focus  
736 Diagnostics, CA). After ZIKV infection, seroreactivity to DENV was tested using commercial IgG  
737 and IgM ELISA kits (Focus Diagnostics, Cypress, CA). ZIKV IgG was assessed with available  
738 commercial kits (XpressBio, Frederick, MD and InBios, Seattle, WA respectively). ZIKV-NS1  
739 IgG was examined using a commercial kit (Alpha Diagnostic, San Antonio, TX). All tests were

740 performed per the manufacturer's instructions. For the measurement of IgM levels against ZIKV,  
741 samples were tested using a ZIKV IgM MAC-ELISA assay developed by Aravinda de Silva's  
742 laboratory. Briefly, a 96-well microtiter plate was coated with anti-human IgM (1:50). The plate  
743 was left at 4 C° overnight. Following incubation, coating was removed by dumping and the plate  
744 was blocked for 30 minutes at room temperature. After blocking, the plate was washed once,  
745 and sample dilutions were prepared (1:40) and added to the plate. Positive and negative  
746 controls for ZIKV and DENV were also prepared. After the addition of samples and controls, the  
747 plate was incubated one hour at 37 C° in a humidified chamber. Before adding the antigens, the  
748 plate was washed twice. Stock C6/36 ZIKV and DENV antigens were diluted (1:2 and 1:3,  
749 respectively), and added to the plate. The plate was incubated overnight at 4 C° in a humidified  
750 chamber. The next day, the plate was washed twice, and a horseradish peroxidase (HRP)-  
751 conjugated monoclonal antibody (6B6C-1) was added, followed by incubation for one hour at 37  
752 C° in a humidified chamber. Detecting antibody was diluted in blocking buffer 1:1000 prior to  
753 addition to plate. A last cycle of washing (twice) was performed, and TMB substrate was added  
754 to all wells. Plate was covered immediately to block out light and incubated at room temperature  
755 for 30 minutes. Before colorimetric detection, the plate was allowed to sit at room temperature  
756 for 5 minutes. Optical density at 450 nm (OD) values were measured in three separate readings  
757 at 5-minute intervals. Results were expressed as mean OD of sample reacted with viral antigen  
758 (P)/mean OD of normal human serum reacted with viral antigen (N) and reported as negative  
759 (P/N value of <2), presumptive positive (P/N value of >3) or equivocal (2 < P/N < 3).

760

761 **Immunophenotyping.** Phenotypic characterization of rhesus macaque PBMCs was performed  
762 by multicolor flow cytometry using direct immunofluorescence. Aliquots of 150 ul of heparinized  
763 whole blood were directly incubated with a mix of antibodies for 30 min. at room temperature.  
764 After incubation, red blood cells were fixed and lysed with ACK, and cells were washed three  
765 times with PBS. Samples were analyzed using a MACSQuant Analyzer 10 flow cytometer  
766 (Miltenyi Biotec, CA). The following antibodies were used in this study: CD123-APC (7G3),  
767 CD20-FITC (2H7), CD14-FITC (M5E2), CD16-Alexa Fluor 700 (3G8), CD20-PacBlue (2H7),  
768 CD69-PE (FN50), CD14-V500 (M5E2), KI67-FITC (B56) and CD3-FITC (SP34) from BD-  
769 Biosciences; CD4-PerCP (M-T466), HLA-DR VioGreen (G46.6), CD337 (NKp30)-PE-Vio770  
770 (AF29-4D12), CD8-VioGreen (BW135/80), CD159a (NKG2A)-FITC (REA110), CD3-PE-Vio770  
771 (10D12), CD16-APC-Vio770 (VEP13), CD3-APC (10D12), CD28-APC-Vio770 (15E8) and  
772 CD56-PE (AF12-7H3) from Miltenyi; CD335 (NKp46)-PC5 (BAB281) from Beckman-Coulter;

773 CD11c-PE/Cy7 (3.9), CD8-FITC (SK1) and CD8-BV421 (SK1) from Biolegend. For analyses,  
774 LYM were gated based on their characteristic forward and side scatter pattern; T cells were then  
775 selected with a second gate on the CD3 positive population. CD8<sup>+</sup> T cells were defined as  
776 CD8<sup>+</sup>CD3<sup>+</sup> and CD4<sup>+</sup> T cells were CD4<sup>+</sup>CD3<sup>+</sup>. Natural Killer cells were defined as CD3<sup>-</sup>CD20<sup>-</sup>  
777 CD14<sup>-</sup> and analyzed by the expression of NK cell markers CD16, CD8, NKG2A, NKG2C, NKp30  
778 and NKp46. B cells were defined as CD20<sup>+</sup>CD3<sup>-</sup>CD14<sup>-</sup>. Activation marker CD69 was determined  
779 in each different lymphoid cell population. Monocytes were defined as CD20<sup>-</sup>CD3<sup>-</sup>CD14<sup>+</sup> and  
780 CD20<sup>-</sup>CD3<sup>-</sup>CD14<sup>+</sup>CD16<sup>+</sup>. Finally, dendritic cells (DCs) were separated into two populations by  
781 the expression of CD123 (pDCs) or CD11c (mDCs) in the HLA<sup>-</sup>DR<sup>+</sup>CD3<sup>-</sup> CD14<sup>-</sup>CD20<sup>-</sup>  
782 population. Data analysis was performed using Flowjo (Treesar).

783

784 **Cellular immune response analysis.** Intracellular cytokine staining of PBMCs from rhesus  
785 macaques was performed by multicolor flow cytometry using methods similar to those described  
786 by Meyer et al. Briefly, PBMC samples were thawed 1 day prior to stimulation. Approx.  $1.5 \times 10^6$   
787 PBMCs were infected overnight with DENV-2 (NGC44) at a MOI of 0.1 or ZIKV at a MOI of 0.5  
788 in RPMI medium with 5% FBS. The remaining PBMCs were rested overnight as described  
789 earlier in 5ml of RPMI with 10% FBS. These PBMCs were then stimulated for 6 h at  
790 37C/5%/CO<sub>2</sub> with ZIKV-E peptides (15-mers overlapping by 10 amino acids, 2.5 ug/ml<sup>-1</sup> per  
791 peptide), ZIKV-NS1 protein peptides (15-mers overlapping by 10 amino acids, 475 ng/ml<sup>-1</sup> per  
792 peptide), or DENV-2 E peptides (1.25 ug/ml<sup>-1</sup>), all in the presence of brefeldin A (10 ug/ml<sup>-1</sup>), a-  
793 CD107a-FITC (H4A3) (10 ul), and co-stimulated with a-CD28.2 (1 ug/ml<sup>-1</sup>) and a-CD49d (1  
794 ug/ml<sup>-1</sup>). After stimulation, the cells were stained for the following markers: CD4-PerCP Cy5.5  
795 (Leu-3A (SK3), CD8b-Texas Red (2ST8.5H7), CD3-PacBlue (SP34), CD20-BV605 (2H7),  
796 CD95-V510 (DX2), CD28.2-PE-Cy5, IFN-g-APC (B27) and TNF-a-PE-Cy7 (MAB11). The  
797 samples were run on an LSRII (BD) and analyzed using Flowjo (Treesar). Lymphocytes were  
798 gated based on their characteristic forward and side scatter pattern, T cells were selected with a  
799 second gate on the CD3-positive population, and at the same time CD20 positive cells were  
800 excluded. CD8<sup>+</sup> T cells were defined as CD3<sup>+</sup> CD20<sup>-</sup>CD8<sup>+</sup> and CD4<sup>+</sup> T cells as CD3<sup>+</sup>CD20<sup>-</sup>  
801 CD4<sup>+</sup>. Cytokine expression was determined by the per cent CD4<sup>+</sup> or CD8<sup>+</sup> positive cells, and  
802 then stained positive for the cytokine IFN-g or TNF-a. CD107a were also measured in these  
803 populations to determine functional cytotoxicity. Further analysis was also performed to examine  
804 CD28 and CD95 expression on the LYM populations to study the presence of central and  
805 effector memory cell populations.

806

807 **Multiplex cytokine analysis.** Sera from rhesus macaques was analyzed for 14 cytokines and  
808 chemokines by Luminex using established protocols for Old World primates. Evaluation of  
809 analytes B cell-activating factor (BAFF), eotaxin (CCL11), interferon alpha (IFN- $\alpha$ ), IFN-g, IL-1  
810 receptor antagonist (IL-1Ra), IL-6, interferon-inducible T-cell alpha chemoattractant (I-TAC,  
811 CXCL11), monocyte chemoattractant protein 1 (MCP-1, CCL2), macrophage migration  
812 inhibitory factor (MIF), monokine induced by gamma interferon (MIG, CXCL9), inflammatory  
813 protein 1-alpha (MIP-1a, CCL3), MIP-1b (CCL4), perforin and interferon gamma-induced protein  
814 10 (IP-10, CXCL10) were included in this assay.

815

816 **Statistical methods.** Statistical analyses were performed using GraphPad Prism 7.0 software  
817 (GraphPad Software, San Diego, CA, USA). For viral burden analysis, the log titers and levels  
818 of vRNA were analyzed unpaired multiple t tests and two-way ANOVA. Also, a Chi-squared test  
819 was used to analyze a contingency table created from obtained viremia data. The statistical  
820 significance between or within groups evaluated at different time points was determined using  
821 two-way analysis of variance (ANOVA) (Tukey's, Sidak's or Dunnett's multiple comparisons  
822 test) or unpaired t-test to compare the means. The p values are expressed in relational terms  
823 with the alpha values. The significance threshold for all analyses was set at 0.05; p values less  
824 than 0.01 are expressed as  $P < 0.01$ , while p values less than 0.001 are expressed as  $P < 0.001$ .  
825 Similarly, values less than 0.005 are expressed as  $P < 0.005$ . In figures, p values from 0.01 to  
826 0.05 are depicted as \*, 0.001 to 0.01 as \*\*, 0.0001 to 0.001 as \*\*\*, and lastly, values less than  
827 0.0001 are depicted as \*\*\*\*.

828

829 **Data availability.** All relevant data are available from the authors upon request.

830

### 831 **Acknowledgements**

832 This work would have not been possible without the dedication and commitment of the  
833 Caribbean Primate Research Center and the Animal Resources Center staff. We also  
834 acknowledge the efforts of all persons that in the aftermath of the hurricane Maria showed a  
835 high level of resilience making possible to advance the science in awkward situations.

836 Authors recognize the support provided by Dr. Elmer Rodriguez reviewing the statistics and by  
837 Dr. Willy Ramos for the useful review of the immunology data. This work received support from  
838 grant by Grants 2 P40 OD012217 and 2U42OD021458-15 to MIM and CAS (ORIP, OD, NIH),  
839 and R25GM061838 to C.S.-C. Also, partial support was provided by Grant K22AI104794 to JDB  
840 (NIAID) and partially used resources that were supported by the Southwest National Primate  
841 Research Center grant P51 OD011133 from the Office of Research Infrastructure Programs,  
842 National Institutes of Health.

843

844

845

846 **References**

847

- 848 1. Campos GC, Sardi SI, Sarno M, Brites C. Zika virus infection, a new public health  
849 challenge. *The Brazilian journal of infectious diseases : an official publication of the Brazilian*  
850 *Society of Infectious Diseases*. 2016;20(3):227-8.
- 851 2. Brasil P, Pereira JP, Jr., Moreira ME, Ribeiro Nogueira RM, Damasceno L, Wakimoto M,  
852 et al. Zika Virus Infection in Pregnant Women in Rio de Janeiro. *The New England journal of*  
853 *medicine*. 2016;375(24):2321-34.
- 854 3. Cao-Lomeau VM, Blake A, Mons S, Lastere S, Roche C, Vanhomwegen J, et al.  
855 Guillain-Barre Syndrome outbreak associated with Zika virus infection in French Polynesia: a  
856 case-control study. *Lancet*. 2016;10.1016/S0140-6736(16)00562-6.
- 857 4. Roze B, Najioullah F, Signate A, Apetse K, Brouste Y, Gourgoudou S, et al. Zika virus  
858 detection in cerebrospinal fluid from two patients with encephalopathy, Martinique, February  
859 2016. *Euro surveillance : bulletin Europeen sur les maladies transmissibles = European*  
860 *communicable disease bulletin*. 2016;21(16):10.2807/1560-7917.ES.2016.21.16.30205.
- 861 5. Carteaux G, Maquart M, Bedet A, Contou D, Brugieres P, Fourati S, et al. Zika Virus  
862 Associated with Meningoencephalitis. *The New England journal of medicine*.  
863 2016;374(16):1595-6.
- 864 6. Mecharles S, Herrmann C, Poullain P, Tran TH, Deschamps N, Mathon G, et al. Acute  
865 myelitis due to Zika virus infection. *Lancet*. 2016;387(10026):1481.
- 866 7. Furtado JM, Esposito DL, Klein TM, Teixeira-Pinto T, da Fonseca BA. Uveitis Associated  
867 with Zika Virus Infection. *The New England journal of medicine*. 2016;375(4):394-6.
- 868 8. Sharp TM, Munoz-Jordan J, Perez-Padilla J, Bello-Pagan MI, Rivera A, Pastula DM, et  
869 al. Zika Virus Infection Associated With Severe Thrombocytopenia. *Clinical infectious diseases :*  
870 *an official publication of the Infectious Diseases Society of America*. 2016;DOI  
871 10.1093/cid/ciw476.
- 872 9. D'Ortenzio E, Matheron S, Yazdanpanah Y, de Lamballerie X, Hubert B, Piorkowski G,  
873 et al. Evidence of Sexual Transmission of Zika Virus. *The New England journal of medicine*.  
874 2016;374(22):2195-8.
- 875 10. Musso D, Roche C, Robin E, Nhan T, Teissier A, Cao-Lormeau VM. Potential sexual  
876 transmission of Zika virus. *Emerging infectious diseases*. 2015;21(2):359-61.
- 877 11. Russell K, Hills SL, Oster AM, Porse CC, Danyluk G, Cone M, et al. Male-to-Female  
878 Sexual Transmission of Zika Virus-United States, January-April 2016. *Clinical infectious*  
879 *diseases : an official publication of the Infectious Diseases Society of America*. 2017;64(2):211-  
880 3.
- 881 12. Costa F, Sarno M, Khouri R, de Paula Freitas B, Siqueira I, Ribeiro GS, et al.  
882 Emergence of Congenital Zika Syndrome: Viewpoint From the Front Lines. *Annals of internal*  
883 *medicine*. 2016;164(10):689-91.

- 884 13. Leal MC, Muniz LF, Ferreira TS, Santos CM, Almeida LC, Van Der Linden V, et al.  
885 Hearing Loss in Infants with Microcephaly and Evidence of Congenital Zika Virus Infection -  
886 Brazil, November 2015-May 2016. *MMWR Morbidity and mortality weekly report*.  
887 2016;65(34):917-9.
- 888 14. Teixeira MG, Costa Mda C, de Oliveira WK, Nunes ML, Rodrigues LC. The Epidemic of  
889 Zika Virus-Related Microcephaly in Brazil: Detection, Control, Etiology, and Future Scenarios.  
890 *American journal of public health*. 2016;106(4):601-5.
- 891 15. Anderson KB, Gibbons RV, Cummings DA, Nisalak A, Green S, Libraty DH, et al. A  
892 shorter time interval between first and second dengue infections is associated with protection  
893 from clinical illness in a school-based cohort in Thailand. *The Journal of infectious diseases*.  
894 2014;209(3):360-8.
- 895 16. Guzman MG, Kouri G, Valdes L, Bravo J, Vazquez S, Halstead SB. Enhanced severity  
896 of secondary dengue-2 infections: death rates in 1981 and 1997 Cuban outbreaks. *Rev Panam*  
897 *Salud Publica*. 2002;11(4):223-7.
- 898 17. Montoya M, Gresh L, Mercado JC, Williams KL, Vargas MJ, Gutierrez G, et al.  
899 Symptomatic versus inapparent outcome in repeat dengue virus infections is influenced by the  
900 time interval between infections and study year. *PLoS neglected tropical diseases*.  
901 2013;7(8):e2357.
- 902 18. Kliks SC, Nimmanitya S, Nisalak A, Burke DS. Evidence that maternal dengue  
903 antibodies are important in the development of dengue hemorrhagic fever in infants. *Am J Trop*  
904 *Med Hyg*. 1988;38(2):411-9.
- 905 19. Chau TN, Quyen NT, Thuy TT, Tuan NM, Hoang DM, Dung NT, et al. Dengue in  
906 Vietnamese infants--results of infection-enhancement assays correlate with age-related disease  
907 epidemiology, and cellular immune responses correlate with disease severity. *The Journal of*  
908 *infectious diseases*. 2008;198(4):516-24.
- 909 20. Mongkolsapaya J, Duangchinda T, Dejnirattisai W, Vasanawathana S, Avirutnan P,  
910 Jairungsri A, et al. T cell responses in dengue hemorrhagic fever: are cross-reactive T cells  
911 suboptimal? *J Immunol*. 2006;176(6):3821-9.
- 912 21. Zivna I, Green S, Vaughn DW, Kalayanarooj S, Stephens HA, Chandanayingyong D, et  
913 al. T cell responses to an HLA-B\*07-restricted epitope on the dengue NS3 protein correlate with  
914 disease severity. *J Immunol*. 2002;168(11):5959-65.
- 915 22. Mongkolsapaya J, Dejnirattisai W, Xu XN, Vasanawathana S, Tangthawornchaikul N,  
916 Chairunsri A, et al. Original antigenic sin and apoptosis in the pathogenesis of dengue  
917 hemorrhagic fever. *Nat Med*. 2003;9(7):921-7.
- 918 23. Priyamvada L, Hudson W, Ahmed R, Wrammert J. Humoral cross-reactivity between  
919 Zika and dengue viruses: implications for protection and pathology. *Emerging microbes &*  
920 *infections*. 2017;6(5):e33.
- 921 24. Pantoja P, Perez-Guzman EX, Rodriguez IV, White LJ, Gonzalez O, Serrano C, et al.  
922 Zika virus pathogenesis in rhesus macaques is unaffected by pre-existing immunity to dengue  
923 virus. *Nature communications*. 2017;8:15674.



- 924 25. Stettler K, Beltramello M, Espinosa DA, Graham V, Cassotta A, Bianchi S, et al.  
925 Specificity, cross-reactivity and function of antibodies elicited by Zika virus infection. *Science*  
926 (New York, NY). 2016;DOI 10.1126/science.aaf8505.
- 927 26. Grifoni A, Pham J, Sidney J, O'Rourke PH, Paul S, Peters B, et al. Prior Dengue virus  
928 exposure shapes T cell immunity to Zika virus in humans. *Journal of virology*. 2017;DOI  
929 10.1128/jvi.01469-17.
- 930 27. Osuna CE, Whitney JB. Nonhuman Primate Models of Zika Virus Infection, Immunity,  
931 and Therapeutic Development. *J Infect Dis*. 2017;216(suppl\_10):S928-s34.
- 932 28. Priyamvada L, Suthar MS, Ahmed R, Wrammert J. Humoral Immune Responses Against  
933 Zika Virus Infection and the Importance of Preexisting Flavivirus Immunity. *J Infect Dis*.  
934 2017;216(suppl\_10):S906-s11.
- 935 29. Wen J, Shresta S. T Cell Immunity to Zika and Dengue Viral Infections. *Journal of*  
936 *interferon & cytokine research : the official journal of the International Society for Interferon and*  
937 *Cytokine Research*. 2017;37(11):475-9.
- 938 30. Aliota MT, Dudley DM, Newman CM, Mohr EL, Gellerup DD, Breitbach ME, et al.  
939 Heterologous Protection against Asian Zika Virus Challenge in Rhesus Macaques. *PLoS*  
940 *neglected tropical diseases*. 2016;10(12):e0005168.
- 941 31. McCracken MK, Gromowski GD, Friberg HL, Lin X, Abbink P, De La Barrera R, et al.  
942 Impact of prior flavivirus immunity on Zika virus infection in rhesus macaques. *PLoS pathogens*.  
943 2017;13(8):e1006487.
- 944 32. Masel J, McCracken MK, Gleeson T, Morrison B, Rutherford G, Imrie A, et al. Does prior  
945 dengue virus exposure worsen clinical outcomes of Zika virus infection? A systematic review,  
946 pooled analysis and lessons learned. *PLoS neglected tropical diseases*. 2019;13(1):e0007060.
- 947 33. Gordon A, Gresh L, Ojeda S, Katzelnick LC, Sanchez N, Mercado JC, et al. Prior  
948 dengue virus infection and risk of Zika: A pediatric cohort in Nicaragua. *PLoS medicine*.  
949 2019;16(1):e1002726.
- 950 34. Rodriguez-Barraquer I, Costa F, Nascimento EJM, Nery NJ, Castanha PMS,  
951 Sacramento GA, et al. Impact of preexisting dengue immunity on Zika virus emergence in a  
952 dengue endemic region. *Science (New York, NY)*. 2019;363(6427):607-10.
- 953 35. Collins MH, McGowan E, Jadi R, Young E, Lopez CA, Baric RS, et al. Lack of Durable  
954 Cross-Neutralizing Antibodies Against Zika Virus from Dengue Virus Infection. *Emerging*  
955 *infectious diseases*. 2017;23(5):773-81.
- 956 36. Lanciotti RS, Kosoy OL, Laven JJ, Velez JO, Lambert AJ, Johnson AJ, et al. Genetic  
957 and serologic properties of Zika virus associated with an epidemic, Yap State, Micronesia, 2007.  
958 *Emerging infectious diseases*. 2008;14(8):1232-9.
- 959 37. Montoya M, Collins M, Dejnirattisai W, Katzelnick LC, Puerta-Guardo H, Jadi R, et al.  
960 Longitudinal Analysis of Antibody Cross-neutralization Following Zika Virus and Dengue Virus  
961 Infection in Asia and the Americas. *The Journal of infectious diseases*. 2018;218(4):536-45.

- 962 38. Dejnirattisai W, Supasa P, Wongwiwat W, Rouvinski A, Barba-Spaeth G, Duangchinda  
963 T, et al. Dengue virus sero-cross-reactivity drives antibody-dependent enhancement of infection  
964 with zika virus. *Nature immunology*. 2016.
- 965 39. Priyamvada L, Quicke KM, Hudson WH, Onlamoon N, Sewatanon J, Edupuganti S, et  
966 al. Human antibody responses after dengue virus infection are highly cross-reactive to Zika  
967 virus. *Proceedings of the National Academy of Sciences of the United States of America*.  
968 2016;113(28):7852-7.
- 969 40. Swanstrom JA, Plante JA, Plante KS, Young EF, McGowan E, Gallichotte EN, et al.  
970 Dengue Virus Envelope Dimer Epitope Monoclonal Antibodies Isolated from Dengue Patients  
971 Are Protective against Zika Virus. *mBio*. 2016;7(4):DOI 10.1128/mBio.01123-16.
- 972 41. Pérez-Guzmán EX, Pantoja P, Serrano-Collazo C, Hassert MA, Ortiz-Rosa A, Rodríguez  
973 IV, et al. Time elapsed between Zika and Dengue infections improves the immune response  
974 against Dengue without viremia enhancement in rhesus macaques. *bioRxiv*. 2019:621094.
- 975 42. Priyamvada L, Cho A, Onlamoon N, Zheng NY, Huang M, Kovalenkov Y, et al. B Cell  
976 Responses during Secondary Dengue Virus Infection Are Dominated by Highly Cross-Reactive,  
977 Memory-Derived Plasmablasts. *Journal of virology*. 2016;90(12):5574-85.
- 978 43. Wrammert J, Onlamoon N, Akondy RS, Perng GC, Polsrila K, Chandele A, et al. Rapid  
979 and massive virus-specific plasmablast responses during acute dengue virus infection in  
980 humans. *Journal of virology*. 2012;86(6):2911-8.
- 981 44. Rogers TF, Goodwin EC, Briney B, Sok D, Beutler N, Strubel A, et al. Zika virus  
982 activates de novo and cross-reactive memory B cell responses in dengue-experienced donors.  
983 *Science immunology*. 2017;2(14).
- 984 45. Lai L, Roupheal N, Xu Y, Natrajan MS, Beck A, Hart M, et al. Innate, T-, and B-Cell  
985 Responses in Acute Human Zika Patients. *Clinical infectious diseases : an official publication of  
986 the Infectious Diseases Society of America*. 2018;66(1):1-10.
- 987 46. Yam-Puc JC, Cedillo-Barron L, Aguilar-Medina EM, Ramos-Payan R, Escobar-Gutierrez  
988 A, Flores-Romo L. The Cellular Bases of Antibody Responses during Dengue Virus Infection.  
989 *Frontiers in immunology*. 2016;7:218.
- 990 47. Lanzavecchia A, Sallusto F. Dynamics of T lymphocyte responses: intermediates,  
991 effectors, and memory cells. *Science (New York, NY)*. 2000;290(5489):92-7.
- 992 48. Sallusto F, Lenig D, Forster R, Lipp M, Lanzavecchia A. Two subsets of memory T  
993 lymphocytes with distinct homing potentials and effector functions. *Nature*. 1999;401(6754):708-  
994 12.
- 995 49. Dudley DM, Aliota MT, Mohr EL, Weiler AM, Lehrer-Brey G, Weisgrau KL, et al. A  
996 rhesus macaque model of Asian-lineage Zika virus infection. *Nature communications*.  
997 2016;7:12204.
- 998 50. Hirsch AJ, Smith JL, Haese NN, Broeckel RM, Parkins CJ, Kreklywich C, et al. Zika  
999 Virus infection of rhesus macaques leads to viral persistence in multiple tissues. *PLoS  
1000 pathogens*. 2017;13(3):e1006219.

- 1001 51. Kaech SM, Wherry EJ, Ahmed R. Effector and memory T-cell differentiation: implications  
1002 for vaccine development. *Nature reviews Immunology*. 2002;2(4):251-62.
- 1003 52. Endy TP, Nisalak A, Chunsuttitwat S, Vaughn DW, Green S, Ennis FA, et al.  
1004 Relationship of preexisting dengue virus (DV) neutralizing antibody levels to viremia and  
1005 severity of disease in a prospective cohort study of DV infection in Thailand. *The Journal of*  
1006 *infectious diseases*. 2004;189(6):990-1000.
- 1007 53. Cui W, Kaech SM. Generation of effector CD8+ T cells and their conversion to memory  
1008 T cells. *Immunological reviews*. 2010;236:151-66.
- 1009 54. Knudsen ML, Ljungberg K, Kakoulidou M, Kostic L, Hallengard D, Garcia-Arriaza J, et al.  
1010 Kinetic and phenotypic analysis of CD8+ T cell responses after priming with alphavirus replicons  
1011 and homologous or heterologous booster immunizations. *Journal of virology*.  
1012 2014;88(21):12438-51.
- 1013 55. Miller JD, van der Most RG, Akondy RS, Glidewell JT, Albott S, Masopust D, et al.  
1014 Human effector and memory CD8+ T cell responses to smallpox and yellow fever vaccines.  
1015 *Immunity*. 2008;28(5):710-22.
- 1016 56. Tian Y, Sette A, Weiskopf D. Cytotoxic CD4 T Cells: Differentiation, Function, and  
1017 Application to Dengue Virus Infection. *Frontiers in immunology*. 2016;7:531.
- 1018 57. Hassert M, Wolf KJ, Schwetye KE, DiPaolo RJ, Brien JD, Pinto AK. CD4+T cells  
1019 mediate protection against Zika associated severe disease in a mouse model of infection. *PLoS*  
1020 *pathogens*. 2018;14(9):e1007237.
- 1021 58. Duangchinda T, Dejnirattisai W, Vasanawathana S, Limpitikul W, Tangthawornchaikul N,  
1022 Malasit P, et al. Immunodominant T-cell responses to dengue virus NS3 are associated with  
1023 DHF. *Proceedings of the National Academy of Sciences of the United States of America*.  
1024 2010;107(39):16922-7.
- 1025 59. Weiskopf D, Bangs DJ, Sidney J, Kolla RV, De Silva AD, de Silva AM, et al. Dengue  
1026 virus infection elicits highly polarized CX3CR1+ cytotoxic CD4+ T cells associated with  
1027 protective immunity. *Proceedings of the National Academy of Sciences of the United States of*  
1028 *America*. 2015;112(31):E4256-63.
- 1029 60. Hatch S, Endy TP, Thomas S, Mathew A, Potts J, Pazoles P, et al. Intracellular cytokine  
1030 production by dengue virus-specific T cells correlates with subclinical secondary infection. *The*  
1031 *Journal of infectious diseases*. 2011;203(9):1282-91.
- 1032 61. Wilkinson TM, Li CK, Chui CS, Huang AK, Perkins M, Liebner JC, et al. Preexisting  
1033 influenza-specific CD4+ T cells correlate with disease protection against influenza challenge in  
1034 humans. *Nat Med*. 2012;18(2):274-80.
- 1035 62. Dalugama C, Gawarammana IB. Dengue hemorrhagic fever complicated with acute liver  
1036 failure: a case report. *Journal of medical case reports*. 2017;11(1):341.
- 1037 63. Fernando S, Wijewickrama A, Gomes L, Punchihewa CT, Madusanka SD, Dissanayake  
1038 H, et al. Patterns and causes of liver involvement in acute dengue infection. *BMC Infect Dis*.  
1039 2016;16:319.

- 1040 64. Guabiraba R, Besnard AG, Marques RE, Mailet I, Fagundes CT, Conceicao TM, et al.  
1041 IL-22 modulates IL-17A production and controls inflammation and tissue damage in  
1042 experimental dengue infection. *Eur J Immunol.* 2013;43(6):1529-44.
- 1043 65. Lin CF, Wan SW, Chen MC, Lin SC, Cheng CC, Chiu SC, et al. Liver injury caused by  
1044 antibodies against dengue virus nonstructural protein 1 in a murine model. *Laboratory*  
1045 *investigation; a journal of technical methods and pathology.* 2008;88(10):1079-89.
- 1046 66. Manickam C, Shah SV, Lucar O, Ram DR, Reeves RK. Cytokine-Mediated Tissue Injury  
1047 in Non-human Primate Models of Viral Infections. *Frontiers in immunology.* 2018;9:2862.
- 1048 67. Martinez Gomez JM, Ong LC, Lam JH, Binte Aman SA, Libau EA, Lee PX, et al.  
1049 Maternal Antibody-Mediated Disease Enhancement in Type I Interferon-Deficient Mice Leads to  
1050 Lethal Disease Associated with Liver Damage. *PLoS Negl Trop Dis.* 2016;10(3):e0004536.
- 1051 68. Paes MV, Lenzi HL, Nogueira AC, Nuovo GJ, Pinhao AT, Mota EM, et al. Hepatic  
1052 damage associated with dengue-2 virus replication in liver cells of BALB/c mice. *Laboratory*  
1053 *investigation; a journal of technical methods and pathology.* 2009;89(10):1140-51.
- 1054 69. Pagliari C, Quaresma JA, Fernandes ER, Stegun FW, Brasil RA, de Andrade HF, Jr., et  
1055 al. Immunopathogenesis of dengue hemorrhagic fever: Contribution to the study of human liver  
1056 lesions. *J Med Virol.* 2013.
- 1057 70. Sung JM, Lee CK, Wu-Hsieh BA. Intrahepatic infiltrating NK and CD8 T cells cause liver  
1058 cell death in different phases of dengue virus infection. *PLoS One.* 2012;7(9):e46292.
- 1059 71. Larreal Y, Valero N, Estevez J, Reyes I, Maldonado M, Espina LM, et al. [Hepatic  
1060 alterations in patients with dengue]. *Invest Clin.* 2005;46(2):169-78.
- 1061 72. Lee LK, Gan VC, Lee VJ, Tan AS, Leo YS, Lye DC. Clinical relevance and  
1062 discriminatory value of elevated liver aminotransferase levels for dengue severity. *PLoS Negl*  
1063 *Trop Dis.* 2012;6(6):e1676.
- 1064 73. Nguyen TL, Nguyen TH, Tieu NT. The impact of dengue haemorrhagic fever on liver  
1065 function. *Research in virology.* 1997;148(4):273-7.
- 1066 74. Souza LJ, Alves JG, Nogueira RM, Gicovate Neto C, Bastos DA, Siqueira EW, et al.  
1067 Aminotransferase changes and acute hepatitis in patients with dengue fever: analysis of 1,585  
1068 cases. *The Brazilian journal of infectious diseases : an official publication of the Brazilian*  
1069 *Society of Infectious Diseases.* 2004;8(2):156-63.
- 1070 75. Hua L, Yao S, Pham D, Jiang L, Wright J, Sawant D, et al. Cytokine-dependent induction  
1071 of CD4+ T cells with cytotoxic potential during influenza virus infection. *Journal of virology.*  
1072 2013;87(21):11884-93.
- 1073 76. Wen J, Elong Ngonon A, Regla-Nava JA, Kim K, Gorman MJ, Diamond MS, et al. Dengue  
1074 virus-reactive CD8(+) T cells mediate cross-protection against subsequent Zika virus challenge.  
1075 *Nature communications.* 2017;8(1):1459.
- 1076 77. Wen J, Tang WW, Sheets N, Ellison J, Sette A, Kim K, et al. Identification of Zika virus  
1077 epitopes reveals immunodominant and protective roles for dengue virus cross-reactive CD8(+)  
1078 T cells. *Nature microbiology.* 2017;2:17036.

1079 78. Regla-Nava JA, Elong Ngono A, Viramontes KM, Huynh AT, Wang YT, Nguyen AT, et  
1080 al. Cross-reactive Dengue virus-specific CD8(+) T cells protect against Zika virus during  
1081 pregnancy. *Nature communications*. 2018;9(1):3042.

1082 79. Costa F, Ko AI. Zika virus and microcephaly: where do we go from here? *The Lancet*  
1083 *Infectious diseases*. 2018;18(3):236-7.

1084

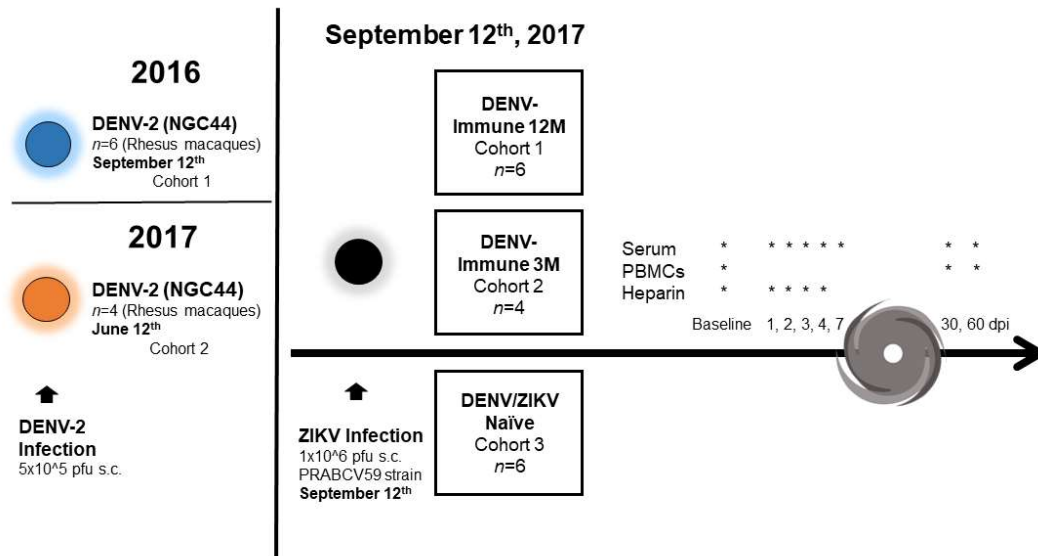

**Figure 1. Experimental design of ZIKV infection in DENV-immune and naïve macaques.** Two cohorts of rhesus macaques (*Macaca mulatta*) were exposed to DENV-2 ( $5 \times 10^5$  pfu s.c.) at different timepoints. Both cohorts were exposed to ZIKV strain PRABCV59 ( $1 \times 10^6$  pfu s.c.) on September 12<sup>th</sup>, 2017, along with a third cohort composed of zika and dengue naïve animals (n=6). ZIKV infection was performed 12 months after DENV infection for cohort 1 (n=6), and 3 months after DENV infection for cohort 2 (n=4). Serum was collected at baseline and days 1 through 7 post ZIKV infection (p.i.). Sample collection was interrupted by Hurricane María's impact, and resumed on day 30 p.i. PBMCs could only be obtained on baseline, day 30 and 60 p.i., while heparinized whole blood was collected on baseline and days 1 through 3 p.i. Additionally, urine was collected on baseline and days 2, 4 and 6 p.i.

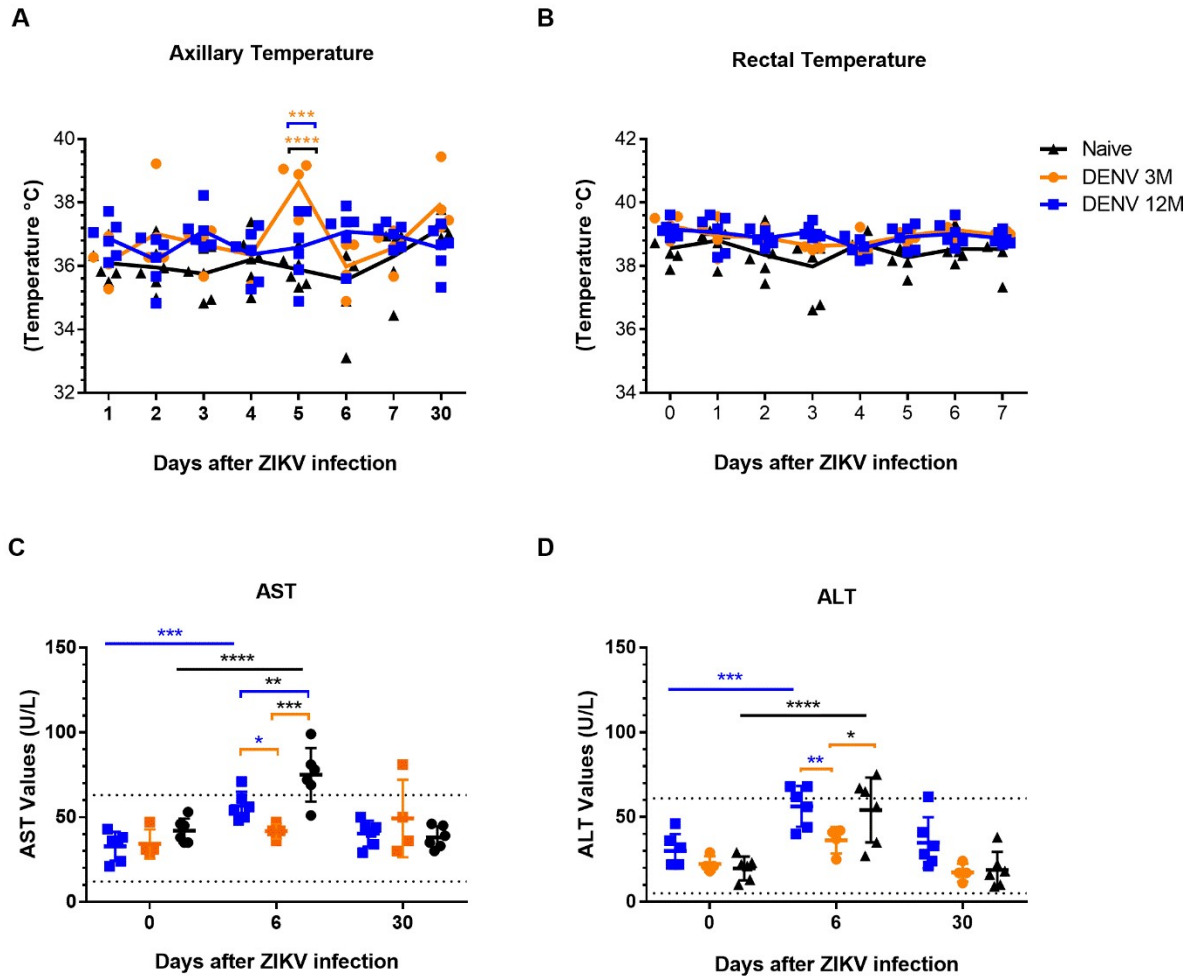

**Figure 2. Vital signs and clinical laboratory status of macaques before and after ZIKV infection.** Significant changes in the vital signs and laboratory values after ZIKV infection are shown. In all panels, animals exposed to DENV 12 months before ZIKV infection are depicted in blue, while animals exposed to DENV 3 months before are in orange. Naïve animals are in black. (A) External temperature (in Celsius) and (B) rectal temperature (in Celsius) were measured. Statistically significant differences among groups were calculated by two-way ANOVA using Tukey's multiple comparisons test (\*\* $P < 0.0005$  and \*\*\*\* $P < 0.0001$ ). (C) Aspartate Aminotransferase (AST) and (D) Alanine Aminotransferase (ALT) levels at different timepoints. Dotted lines represent normal clinical ranges for rhesus macaques. Statistically significant differences among groups were calculated using an unpaired multiple t test, while differences within cohorts in respect with their baseline values were computed by two-way ANOVA using Dunnett's multiple comparisons test (\* $P < 0.05$ , \*\* $P < 0.001$ , \*\*\* $P \leq 0.0001$  and \*\*\*\* $P < 0.0001$ ). Colored stars represent a significantly different group, while colored lines represent the group that it is compared to.

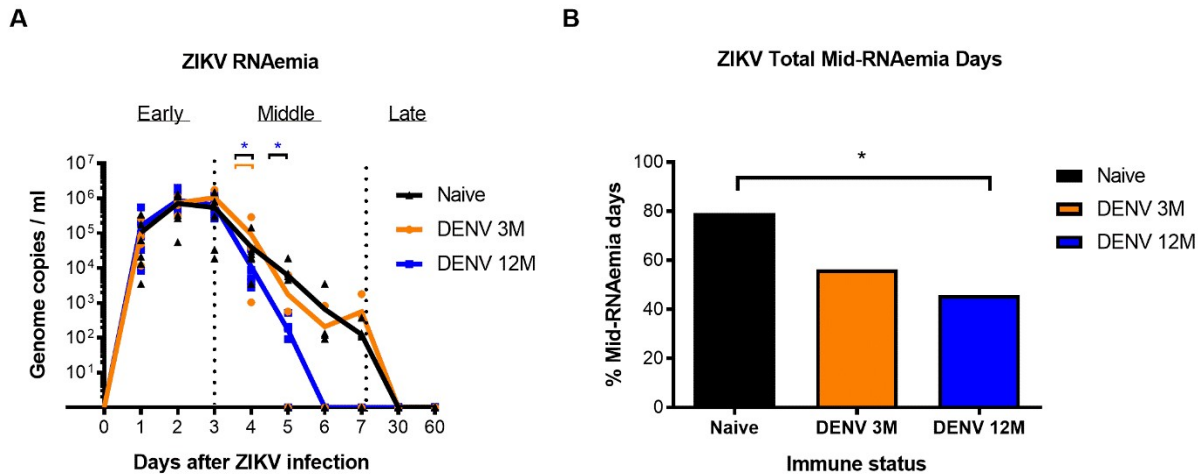

**Figure 3. Zika RNA kinetics in serum and RNAemia days per cohort.** RNAemia days are affected by convalescence produced after DENV infection depending on time between exposures. In all panels, animals exposed to DENV 12 months before ZIKV infection are in blue, while animals exposed to DENV 3 months before are in orange. Naïve animals are in black. (A) Zika RNAemia was defined as early RNAemia (days 1 to 3 p.i.), mid RNAemia (days 4 to 7 p.i.), and late RNAemia (days 7 p.i. onwards). ZIKV replication was detected in serum during the first 7 days after infection. Statistically significant differences were observed using unpaired multiple t tests (\* $P < 0.05$ ). Genome copies per mL are shown logarithmically. (B) Total mid-RNAemia days were calculated using the following formula: total viremia days divided by total possible viremia days and are expressed as percentage. The obtained values were placed in a contingency table. Statistically significant differences of viremia days were calculated using a two-sided Fisher's exact test (\* $P < 0.05$ ). Colored stars represent a significantly different group, while colored lines represent the group that it is compared to.



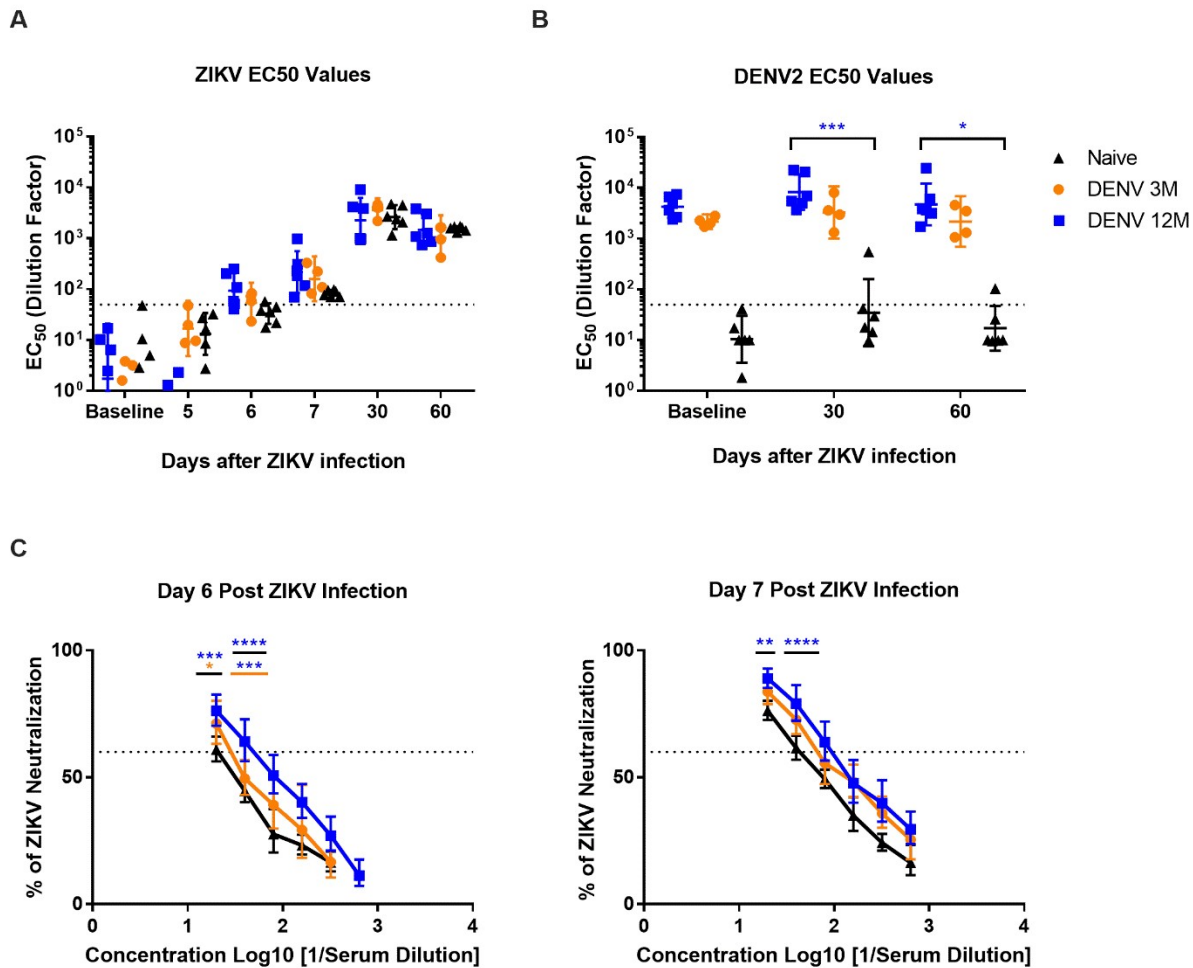

**Figure 4. Geometric mean titers of dengue and ZIKV neutralizing antibodies.** The 50% effective concentration of neutralizing antibodies was determined. Animals from cohort 1 are shown in blue, animals from cohort 2 are shown in orange and naïve animals from cohort 3 are shown in black in all panels. Dotted line indicates the limit of detection for the assay. Non-neutralizing sera were assigned a value of one-half of the limit of detection for visualization and calculation of the geometric means and confidence intervals. (A) EC<sub>50</sub> values of neutralizing antibodies against ZIKV after ZIKV infection. (B) EC<sub>50</sub> values of neutralizing antibodies against DENV2 after ZIKV infection. Statistically significant differences among groups were calculated by two-way ANOVA using Tukey's multiple comparisons test (\*P<0.05 and \*\*\*P≤0.001). (C) Dilution titers against ZIKV are shown during day 6 and 7 post ZIKV infection. Statistically significant differences among groups were calculated by two-way ANOVA using Tukey's multiple comparisons test (\*P<0.05, \*\*P<0.001, \*\*\*P≤0.001 and \*\*\*\*P<0.0001). Colored stars represent a significantly different group, while colored lines represent the group that it is compared to.

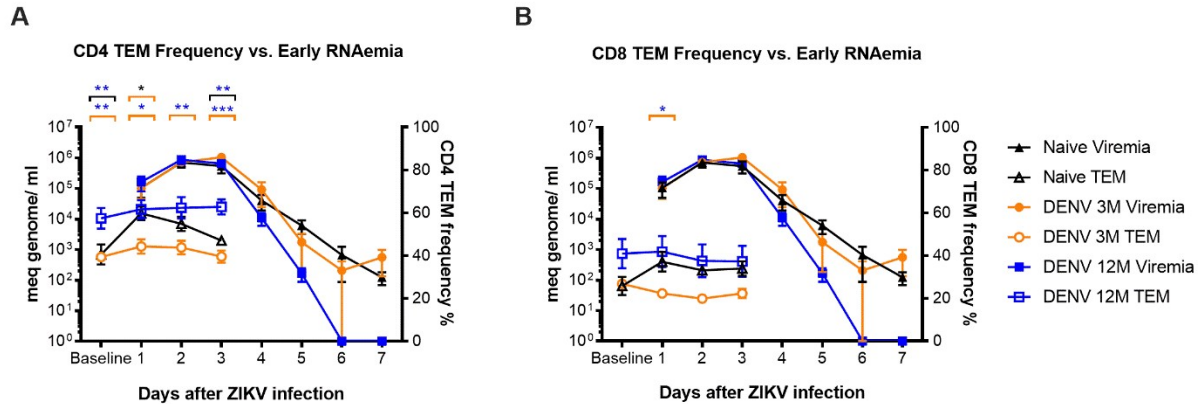

**Figure 5. CD4 but not CD8 effector memory cell frequency is associated to early decreased ZIKV RNAemia.** Effector memory T cell frequency up to day 3 p.i. is shown in comparison to RNAemia (days 1 to 7 p.i.). Animals exposed to DENV 12 months before ZIKV infection are in blue, animals exposed to DENV 3 months before are in orange and naïve animals are in black. (A-B) Genome copies per mL are shown logarithmically, represented by filled colored symbols (left Y axis), while CD4 and CD8 effector memory T cell frequency is represented by hollow symbols (right Y axis). Comparisons between cohorts were performed by two-way ANOVA using Tukey's multiple comparisons test (\* $P < 0.05$ , \*\* $P < 0.001$  and \*\*\* $P \leq 0.001$ ). Significant statistical differences shown belong to effector memory T cell frequency. Colored stars represent a significantly different group, while colored lines represent the group that it is compared to.

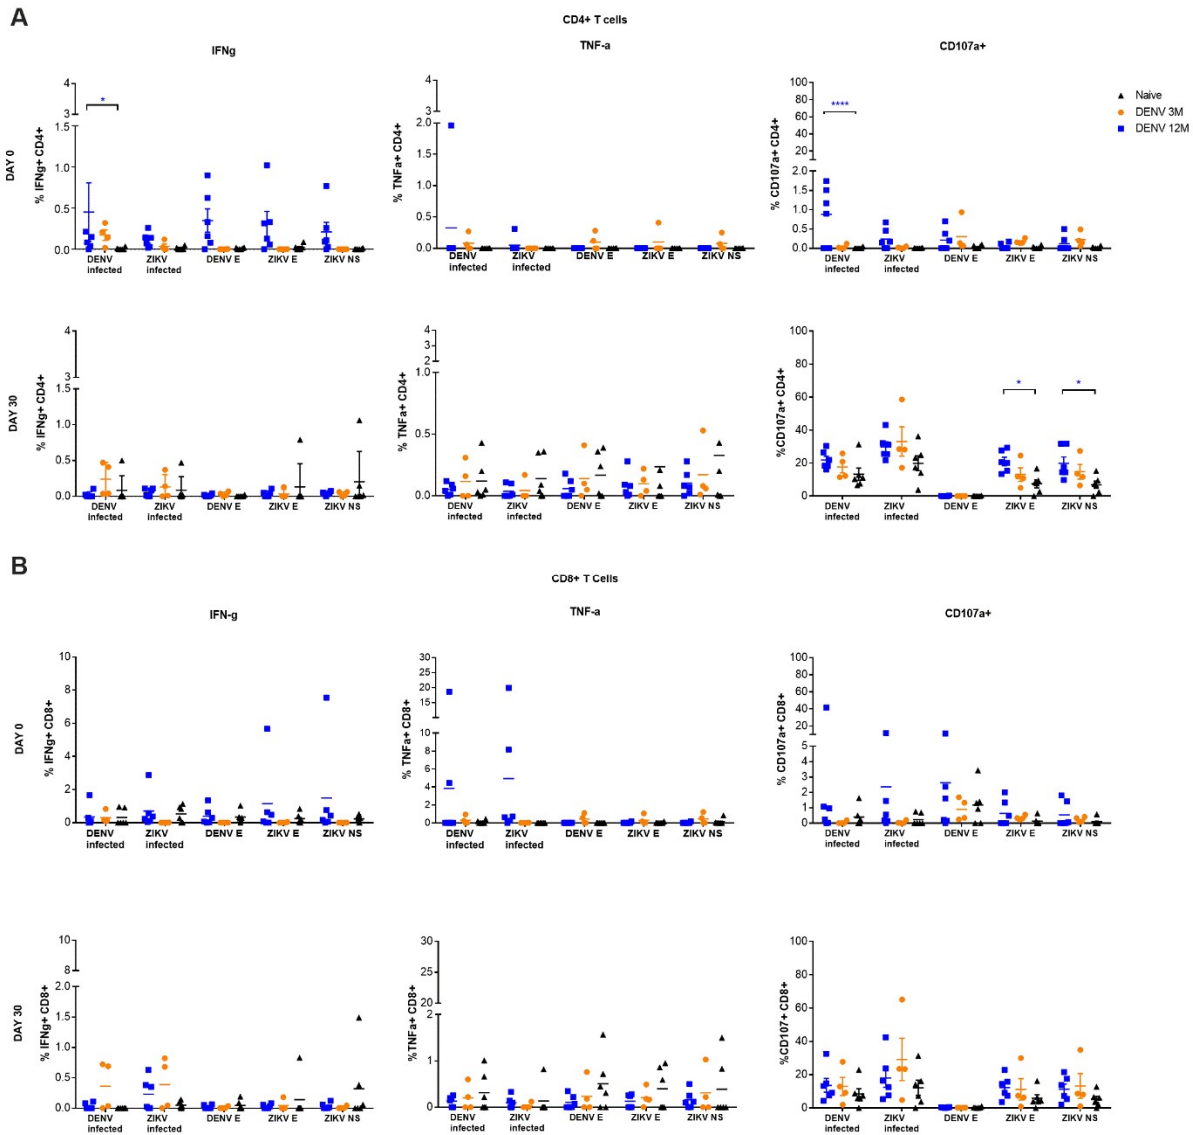

**Figure 6. Antigen-specific CD4<sup>+</sup> and CD8<sup>+</sup> response prior and after ZIKV infection.** The frequency of the specific response to DENV and ZIKV antigens differs among cohorts. In all panels, animals exposed to DENV 12 months before ZIKV infection are in blue, while animals exposed to DENV 3 months before are in orange. Naïve animals are in black. All percentages shown are subtracted from the unstimulated background. (A) Analysis of CD4 T cell response to different stimuli before (upper panel) and 30 days after ZIKV infection (lower panel). (B) Analysis of CD8 T cell response to different stimuli before (upper panel) and 30 days after ZIKV infection (lower panel). Statistically significant differences among groups were calculated by two-way ANOVA using Dunnett's multiple comparisons test (\* $P < 0.05$  and \*\*\*\* $P < 0.0001$ ). Colored stars represent a significantly different group, while colored lines represent the group that it is compared to.

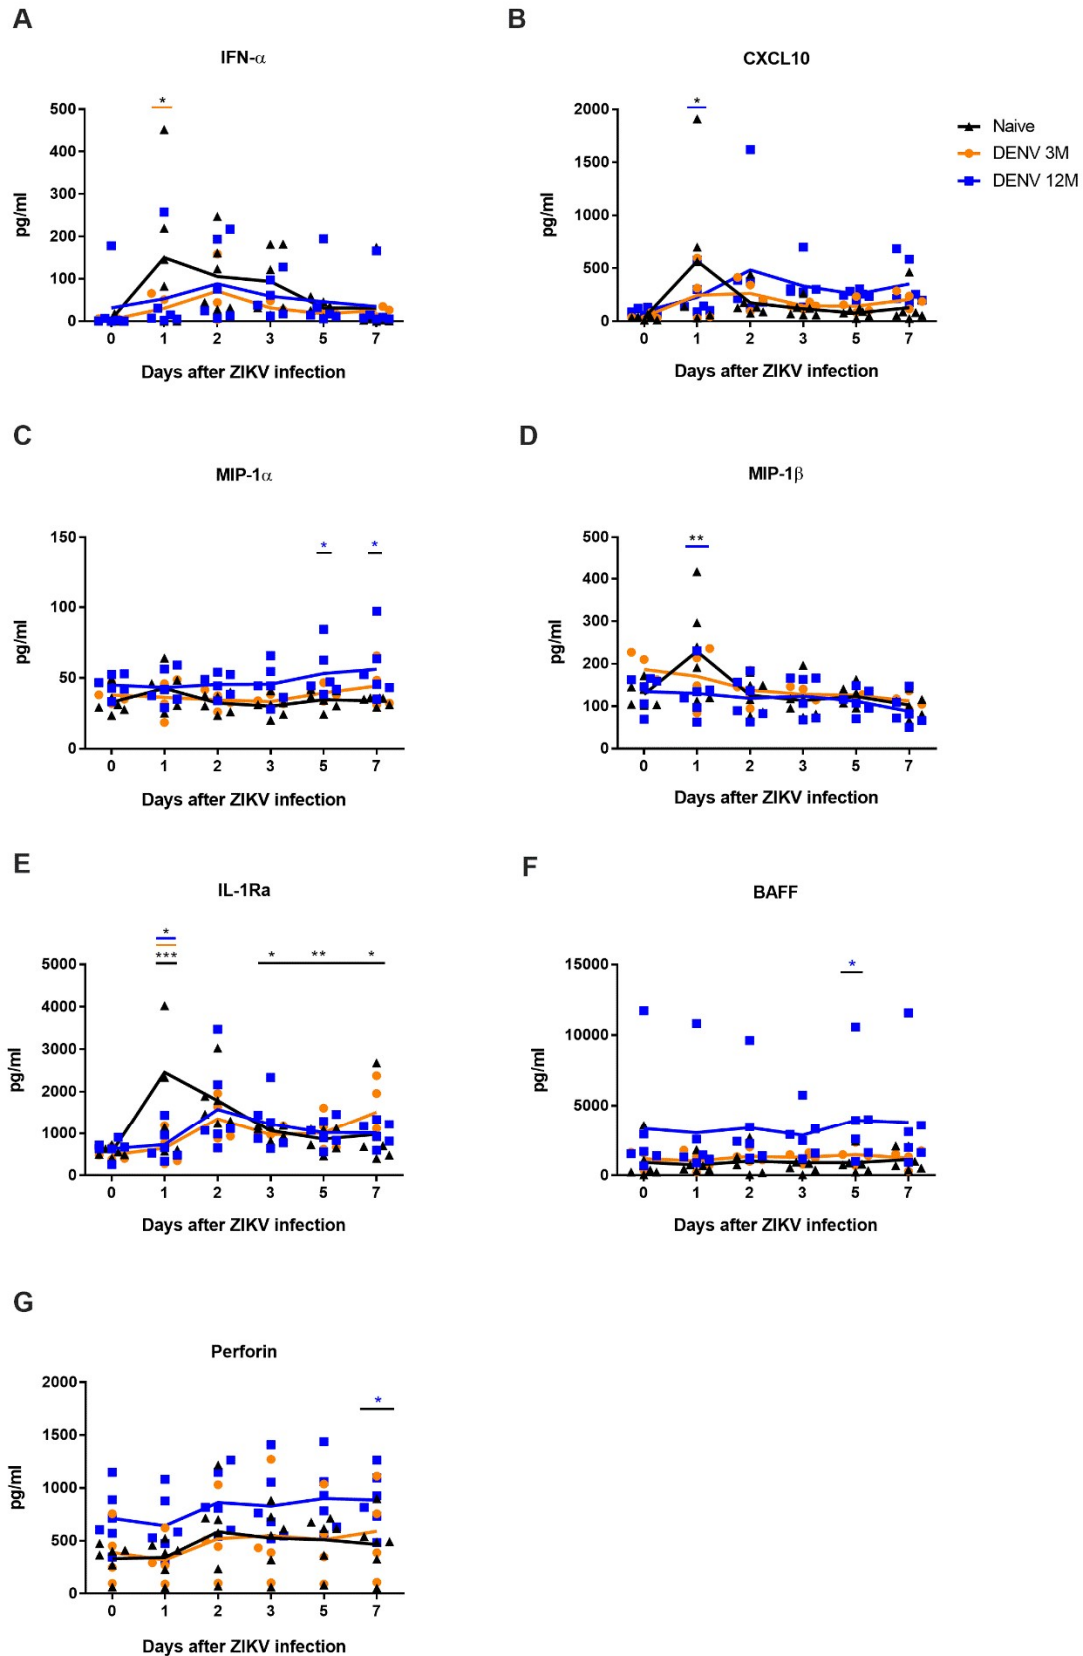

**Figure 7. Previous exposure to DENV modulates the cytokine and chemokine profiles after ZIKV infection.** (A-G) Significant cytokine and chemokine profiles of are depicted in pg per mL. In all panels, animals exposed to DENV 12 months before ZIKV infection are in blue, while animals exposed to DENV 3 months before are in orange. Naïve animals are in black. Statistically significant differences among groups were calculated by two-way ANOVA using Tukey's, Sidak's and Dunnett's multiple comparisons tests (\* $P < 0.05$ , \*\* $P < 0.001$  and \*\*\* $P \leq 0.0001$ ). Colored stars represent a significantly different group, while colored lines represent the group that it is compared to.
